# Supplementary material for: Integrated Puncture Score: force–displacement weighted rind penetration tests improve stalk lodging resistance estimations in maize
Source: Plant Methods. 2020 Aug 15;16:113. doi: 10.1186/s13007-020-00654-w (PMC7429900; doi:10.1186/s13007-020-00654-w)
Supplement: Supplementary file 2 — Additional file 2. Example force-displacement data from a puncture test. [file 13007_2020_654_MOESM2_ESM.csv]

Time	Displacement	Force
(s)	(mm)	(N)
0.0000	-14.1792	-0.0131
0.0010	-14.1792	-0.0131
0.0020	-14.1792	-0.0130
0.0030	-14.1792	-0.0127
0.0040	-14.1792	-0.0120
0.0050	-14.1792	-0.0105
0.0060	-14.1792	-0.0082
0.0070	-14.1792	-0.0050
0.0080	-14.1791	-0.0007
0.0090	-14.1790	0.0054
0.0100	-14.1789	0.0134
0.0110	-14.1786	0.0229
0.0120	-14.1784	0.0333
0.0130	-14.1780	0.0439
0.0140	-14.1775	0.0543
0.0150	-14.1769	0.0647
0.0160	-14.1762	0.0753
0.0170	-14.1753	0.0864
0.0180	-14.1742	0.0986
0.0190	-14.1729	0.1128
0.0200	-14.1714	0.1300
0.0210	-14.1697	0.1519
0.0220	-14.1677	0.1805
0.0230	-14.1655	0.2179
0.0240	-14.1630	0.2661
0.0250	-14.1601	0.3270
0.0260	-14.1570	0.4027
0.0270	-14.1535	0.4949
0.0280	-14.1496	0.6055
0.0290	-14.1454	0.7364
0.0300	-14.1407	0.8890
0.0310	-14.1357	1.0647
0.0320	-14.1303	1.2644
0.0330	-14.1244	1.4887
0.0340	-14.1180	1.7382
0.0350	-14.1112	2.0136
0.0360	-14.1039	2.3156
0.0370	-14.0961	2.6447
0.0380	-14.0878	3.0012
0.0390	-14.0790	3.3853
0.0400	-14.0697	3.7967
0.0410	-14.0598	4.2349
0.0420	-14.0494	4.6994
0.0430	-14.0384	5.1898
0.0440	-14.0269	5.7058
0.0450	-14.0147	6.2470
0.0460	-14.0020	6.8128
0.0470	-13.9887	7.4025
0.0480	-13.9748	8.0151
0.0490	-13.9603	8.6496
0.0500	-13.9452	9.3043
0.0510	-13.9295	9.9774
0.0520	-13.9132	10.6672
0.0530	-13.8963	11.3722
0.0540	-13.8789	12.0913
0.0550	-13.8608	12.8233
0.0560	-13.8423	13.5671
0.0570	-13.8233	14.3213
0.0580	-13.8037	15.0841
0.0590	-13.7837	15.8533
0.0600	-13.7633	16.6266
0.0610	-13.7425	17.4024
0.0620	-13.7212	18.1794
0.0630	-13.6996	18.9567
0.0640	-13.6777	19.7335
0.0650	-13.6555	20.5088
0.0660	-13.6329	21.2820
0.0670	-13.6101	22.0521
0.0680	-13.5871	22.8183
0.0690	-13.5638	23.5798
0.0700	-13.5403	24.3353
0.0710	-13.5167	25.0839
0.0720	-13.4928	25.8248
0.0730	-13.4688	26.5572
0.0740	-13.4447	27.2803
0.0750	-13.4204	27.9942
0.0760	-13.3960	28.6985
0.0770	-13.3715	29.3927
0.0780	-13.3468	30.0761
0.0790	-13.3221	30.7479
0.0800	-13.2973	31.4081
0.0810	-13.2724	32.0567
0.0820	-13.2475	32.6939
0.0830	-13.2225	33.3200
0.0840	-13.1974	33.9348
0.0850	-13.1722	34.5387
0.0860	-13.1470	35.1317
0.0870	-13.1217	35.7136
0.0880	-13.0964	36.2842
0.0890	-13.0711	36.8431
0.0900	-13.0457	37.3900
0.0910	-13.0202	37.9246
0.0920	-12.9947	38.4467
0.0930	-12.9692	38.9562
0.0940	-12.9436	39.4529
0.0950	-12.9180	39.9367
0.0960	-12.8924	40.4072
0.0970	-12.8667	40.8643
0.0980	-12.8410	41.3077
0.0990	-12.8152	41.7361
0.1000	-12.7895	42.1473
0.1010	-12.7637	42.5384
0.1020	-12.7379	42.9071
0.1030	-12.7121	43.2514
0.1040	-12.6862	43.5703
0.1050	-12.6603	43.8644
0.1060	-12.6344	44.1344
0.1070	-12.6085	44.3814
0.1080	-12.5826	44.6061
0.1090	-12.5567	44.8097
0.1100	-12.5308	44.9942
0.1110	-12.5048	45.1619
0.1120	-12.4789	45.3152
0.1130	-12.4529	45.4562
0.1140	-12.4270	45.5865
0.1150	-12.4010	45.7072
0.1160	-12.3751	45.8191
0.1170	-12.3491	45.9227
0.1180	-12.3232	46.0184
0.1190	-12.2972	46.1066
0.1200	-12.2713	46.1881
0.1210	-12.2454	46.2636
0.1220	-12.2195	46.3341
0.1230	-12.1936	46.4000
0.1240	-12.1677	46.4617
0.1250	-12.1418	46.5193
0.1260	-12.1159	46.5725
0.1270	-12.0901	46.6208
0.1280	-12.0642	46.6633
0.1290	-12.0384	46.6994
0.1300	-12.0126	46.7286
0.1310	-11.9868	46.7510
0.1320	-11.9610	46.7669
0.1330	-11.9352	46.7772
0.1340	-11.9095	46.7819
0.1350	-11.8837	46.7806
0.1360	-11.8580	46.7715
0.1370	-11.8323	46.7528
0.1380	-11.8066	46.7234
0.1390	-11.7809	46.6838
0.1400	-11.7552	46.6345
0.1410	-11.7295	46.5757
0.1420	-11.7039	46.5067
0.1430	-11.6783	46.4260
0.1440	-11.6526	46.3315
0.1450	-11.6270	46.2189
0.1460	-11.6014	46.0754
0.1470	-11.5758	45.8759
0.1480	-11.5502	45.5965
0.1490	-11.5247	45.2263
0.1500	-11.4991	44.7658
0.1510	-11.4736	44.2223
0.1520	-11.4480	43.6059
0.1530	-11.4225	42.9271
0.1540	-11.3970	42.1955
0.1550	-11.3714	41.4191
0.1560	-11.3459	40.6052
0.1570	-11.3204	39.7595
0.1580	-11.2949	38.8879
0.1590	-11.2694	37.9955
0.1600	-11.2439	37.0870
0.1610	-11.2184	36.1668
0.1620	-11.1930	35.2389
0.1630	-11.1675	34.3070
0.1640	-11.1420	33.3746
0.1650	-11.1165	32.4454
0.1660	-11.0911	31.5225
0.1670	-11.0656	30.6091
0.1680	-11.0401	29.7077
0.1690	-11.0147	28.8211
0.1700	-10.9892	27.9514
0.1710	-10.9638	27.1005
0.1720	-10.9383	26.2703
0.1730	-10.9129	25.4618
0.1740	-10.8874	24.6757
0.1750	-10.8620	23.9122
0.1760	-10.8365	23.1716
0.1770	-10.8111	22.4543
0.1780	-10.7856	21.7607
0.1790	-10.7602	21.0912
0.1800	-10.7348	20.4460
0.1810	-10.7093	19.8253
0.1820	-10.6839	19.2293
0.1830	-10.6585	18.6581
0.1840	-10.6330	18.1117
0.1850	-10.6076	17.5897
0.1860	-10.5822	17.0917
0.1870	-10.5568	16.6173
0.1880	-10.5313	16.1663
0.1890	-10.5059	15.7383
0.1900	-10.4805	15.3328
0.1910	-10.4551	14.9493
0.1920	-10.4296	14.5873
0.1930	-10.4042	14.2458
0.1940	-10.3788	13.9243
0.1950	-10.3534	13.6222
0.1960	-10.3279	13.3393
0.1970	-10.3025	13.0753
0.1980	-10.2771	12.8295
0.1990	-10.2517	12.6014
0.2000	-10.2262	12.3902
0.2010	-10.2008	12.1952
0.2020	-10.1754	12.0156
0.2030	-10.1500	11.8505
0.2040	-10.1246	11.6991
0.2050	-10.0991	11.5605
0.2060	-10.0737	11.4339
0.2070	-10.0483	11.3189
0.2080	-10.0229	11.2150
0.2090	-9.9975	11.1215
0.2100	-9.9720	11.0377
0.2110	-9.9466	10.9625
0.2120	-9.9212	10.8955
0.2130	-9.8958	10.8360
0.2140	-9.8704	10.7833
0.2150	-9.8450	10.7364
0.2160	-9.8195	10.6941
0.2170	-9.7941	10.6557
0.2180	-9.7687	10.6209
0.2190	-9.7433	10.5896
0.2200	-9.7179	10.5619
0.2210	-9.6925	10.5379
0.2220	-9.6670	10.5173
0.2230	-9.6416	10.5001
0.2240	-9.6162	10.4857
0.2250	-9.5908	10.4741
0.2260	-9.5654	10.4646
0.2270	-9.5400	10.4569
0.2280	-9.5146	10.4506
0.2290	-9.4891	10.4456
0.2300	-9.4637	10.4414
0.2310	-9.4383	10.4377
0.2320	-9.4129	10.4344
0.2330	-9.3875	10.4309
0.2340	-9.3621	10.4271
0.2350	-9.3367	10.4228
0.2360	-9.3113	10.4177
0.2370	-9.2859	10.4117
0.2380	-9.2605	10.4042
0.2390	-9.2351	10.3947
0.2400	-9.2097	10.3827
0.2410	-9.1842	10.3679
0.2420	-9.1588	10.3502
0.2430	-9.1334	10.3293
0.2440	-9.1080	10.3050
0.2450	-9.0826	10.2777
0.2460	-9.0572	10.2473
0.2470	-9.0318	10.2142
0.2480	-9.0064	10.1788
0.2490	-8.9810	10.1411
0.2500	-8.9556	10.1012
0.2510	-8.9302	10.0589
0.2520	-8.9048	10.0137
0.2530	-8.8793	9.9657
0.2540	-8.8539	9.9148
0.2550	-8.8285	9.8612
0.2560	-8.8031	9.8053
0.2570	-8.7777	9.7472
0.2580	-8.7523	9.6872
0.2590	-8.7268	9.6256
0.2600	-8.7014	9.5624
0.2610	-8.6760	9.4976
0.2620	-8.6506	9.4316
0.2630	-8.6252	9.3643
0.2640	-8.5997	9.2961
0.2650	-8.5743	9.2273
0.2660	-8.5489	9.1582
0.2670	-8.5235	9.0893
0.2680	-8.4981	9.0208
0.2690	-8.4726	8.9532
0.2700	-8.4472	8.8868
0.2710	-8.4218	8.8216
0.2720	-8.3964	8.7577
0.2730	-8.3710	8.6949
0.2740	-8.3456	8.6334
0.2750	-8.3201	8.5734
0.2760	-8.2947	8.5149
0.2770	-8.2693	8.4578
0.2780	-8.2439	8.4019
0.2790	-8.2185	8.3467
0.2800	-8.1931	8.2921
0.2810	-8.1676	8.2380
0.2820	-8.1422	8.1845
0.2830	-8.1168	8.1314
0.2840	-8.0914	8.0787
0.2850	-8.0660	8.0264
0.2860	-8.0406	7.9749
0.2870	-8.0151	7.9243
0.2880	-7.9897	7.8749
0.2890	-7.9643	7.8270
0.2900	-7.9389	7.7805
0.2910	-7.9135	7.7357
0.2920	-7.8881	7.6927
0.2930	-7.8627	7.6516
0.2940	-7.8373	7.6124
0.2950	-7.8119	7.5752
0.2960	-7.7864	7.5400
0.2970	-7.7610	7.5068
0.2980	-7.7356	7.4757
0.2990	-7.7102	7.4464
0.3000	-7.6848	7.4190
0.3010	-7.6594	7.3935
0.3020	-7.6340	7.3696
0.3030	-7.6086	7.3473
0.3040	-7.5832	7.3266
0.3050	-7.5578	7.3076
0.3060	-7.5324	7.2899
0.3070	-7.5070	7.2735
0.3080	-7.4816	7.2582
0.3090	-7.4562	7.2440
0.3100	-7.4308	7.2307
0.3110	-7.4054	7.2178
0.3120	-7.3800	7.2046
0.3130	-7.3546	7.1906
0.3140	-7.3292	7.1759
0.3150	-7.3038	7.1608
0.3160	-7.2784	7.1454
0.3170	-7.2529	7.1298
0.3180	-7.2275	7.1142
0.3190	-7.2021	7.0986
0.3200	-7.1767	7.0830
0.3210	-7.1513	7.0676
0.3220	-7.1259	7.0526
0.3230	-7.1005	7.0382
0.3240	-7.0751	7.0244
0.3250	-7.0497	7.0113
0.3260	-7.0243	6.9990
0.3270	-6.9989	6.9878
0.3280	-6.9736	6.9780
0.3290	-6.9482	6.9695
0.3300	-6.9228	6.9623
0.3310	-6.8974	6.9564
0.3320	-6.8720	6.9517
0.3330	-6.8466	6.9482
0.3340	-6.8212	6.9456
0.3350	-6.7958	6.9442
0.3360	-6.7704	6.9438
0.3370	-6.7450	6.9446
0.3380	-6.7197	6.9466
0.3390	-6.6943	6.9498
0.3400	-6.6689	6.9539
0.3410	-6.6435	6.9588
0.3420	-6.6181	6.9639
0.3430	-6.5927	6.9691
0.3440	-6.5673	6.9740
0.3450	-6.5419	6.9787
0.3460	-6.5165	6.9835
0.3470	-6.4911	6.9885
0.3480	-6.4657	6.9939
0.3490	-6.4403	6.9996
0.3500	-6.4149	7.0057
0.3510	-6.3895	7.0127
0.3520	-6.3641	7.0205
0.3530	-6.3387	7.0291
0.3540	-6.3133	7.0382
0.3550	-6.2879	7.0477
0.3560	-6.2625	7.0573
0.3570	-6.2371	7.0672
0.3580	-6.2117	7.0775
0.3590	-6.1863	7.0885
0.3600	-6.1609	7.1001
0.3610	-6.1355	7.1125
0.3620	-6.1101	7.1255
0.3630	-6.0847	7.1391
0.3640	-6.0593	7.1535
0.3650	-6.0339	7.1687
0.3660	-6.0085	7.1846
0.3670	-5.9830	7.2011
0.3680	-5.9576	7.2185
0.3690	-5.9322	7.2366
0.3700	-5.9068	7.2551
0.3710	-5.8814	7.2732
0.3720	-5.8560	7.2903
0.3730	-5.8306	7.3060
0.3740	-5.8052	7.3205
0.3750	-5.7798	7.3337
0.3760	-5.7544	7.3459
0.3770	-5.7290	7.3572
0.3780	-5.7036	7.3679
0.3790	-5.6782	7.3779
0.3800	-5.6527	7.3871
0.3810	-5.6273	7.3953
0.3820	-5.6019	7.4023
0.3830	-5.5765	7.4083
0.3840	-5.5511	7.4135
0.3850	-5.5257	7.4179
0.3860	-5.5003	7.4218
0.3870	-5.4749	7.4253
0.3880	-5.4495	7.4286
0.3890	-5.4241	7.4316
0.3900	-5.3987	7.4343
0.3910	-5.3733	7.4368
0.3920	-5.3479	7.4392
0.3930	-5.3225	7.4416
0.3940	-5.2971	7.4443
0.3950	-5.2717	7.4470
0.3960	-5.2463	7.4496
0.3970	-5.2210	7.4520
0.3980	-5.1956	7.4544
0.3990	-5.1702	7.4566
0.4000	-5.1448	7.4589
0.4010	-5.1194	7.4610
0.4020	-5.0940	7.4626
0.4030	-5.0686	7.4634
0.4040	-5.0432	7.4632
0.4050	-5.0178	7.4620
0.4060	-4.9924	7.4599
0.4070	-4.9670	7.4568
0.4080	-4.9416	7.4533
0.4090	-4.9162	7.4493
0.4100	-4.8908	7.4451
0.4110	-4.8654	7.4404
0.4120	-4.8400	7.4354
0.4130	-4.8146	7.4303
0.4140	-4.7892	7.4254
0.4150	-4.7638	7.4206
0.4160	-4.7384	7.4163
0.4170	-4.7130	7.4125
0.4180	-4.6876	7.4091
0.4190	-4.6622	7.4064
0.4200	-4.6368	7.4043
0.4210	-4.6114	7.4033
0.4220	-4.5860	7.4037
0.4230	-4.5606	7.4056
0.4240	-4.5352	7.4093
0.4250	-4.5098	7.4149
0.4260	-4.4844	7.4222
0.4270	-4.4590	7.4312
0.4280	-4.4336	7.4420
0.4290	-4.4082	7.4543
0.4300	-4.3828	7.4683
0.4310	-4.3574	7.4839
0.4320	-4.3320	7.5012
0.4330	-4.3066	7.5201
0.4340	-4.2812	7.5403
0.4350	-4.2558	7.5616
0.4360	-4.2304	7.5837
0.4370	-4.2050	7.6062
0.4380	-4.1796	7.6290
0.4390	-4.1542	7.6517
0.4400	-4.1288	7.6740
0.4410	-4.1034	7.6960
0.4420	-4.0780	7.7177
0.4430	-4.0526	7.7391
0.4440	-4.0272	7.7600
0.4450	-4.0018	7.7804
0.4460	-3.9764	7.8001
0.4470	-3.9510	7.8191
0.4480	-3.9256	7.8374
0.4490	-3.9002	7.8550
0.4500	-3.8748	7.8719
0.4510	-3.8494	7.8882
0.4520	-3.8240	7.9039
0.4530	-3.7986	7.9189
0.4540	-3.7732	7.9331
0.4550	-3.7478	7.9463
0.4560	-3.7224	7.9585
0.4570	-3.6970	7.9696
0.4580	-3.6716	7.9792
0.4590	-3.6462	7.9871
0.4600	-3.6208	7.9931
0.4610	-3.5954	7.9971
0.4620	-3.5700	7.9994
0.4630	-3.5446	8.0001
0.4640	-3.5192	7.9997
0.4650	-3.4938	7.9985
0.4660	-3.4684	7.9970
0.4670	-3.4430	7.9955
0.4680	-3.4176	7.9941
0.4690	-3.3922	7.9928
0.4700	-3.3668	7.9919
0.4710	-3.3414	7.9913
0.4720	-3.3160	7.9912
0.4730	-3.2906	7.9917
0.4740	-3.2652	7.9928
0.4750	-3.2398	7.9947
0.4760	-3.2144	7.9970
0.4770	-3.1890	7.9997
0.4780	-3.1636	8.0029
0.4790	-3.1382	8.0068
0.4800	-3.1128	8.0115
0.4810	-3.0874	8.0170
0.4820	-3.0620	8.0231
0.4830	-3.0366	8.0298
0.4840	-3.0112	8.0370
0.4850	-2.9858	8.0449
0.4860	-2.9604	8.0537
0.4870	-2.9350	8.0633
0.4880	-2.9096	8.0738
0.4890	-2.8842	8.0851
0.4900	-2.8588	8.0971
0.4910	-2.8334	8.1098
0.4920	-2.8080	8.1234
0.4930	-2.7826	8.1376
0.4940	-2.7572	8.1525
0.4950	-2.7318	8.1679
0.4960	-2.7064	8.1838
0.4970	-2.6810	8.2004
0.4980	-2.6556	8.2175
0.4990	-2.6302	8.2345
0.5000	-2.6048	8.2508
0.5010	-2.5794	8.2660
0.5020	-2.5540	8.2802
0.5030	-2.5286	8.2929
0.5040	-2.5032	8.3040
0.5050	-2.4778	8.3135
0.5060	-2.4524	8.3215
0.5070	-2.4270	8.3285
0.5080	-2.4016	8.3350
0.5090	-2.3762	8.3414
0.5100	-2.3508	8.3476
0.5110	-2.3254	8.3539
0.5120	-2.3000	8.3605
0.5130	-2.2746	8.3676
0.5140	-2.2492	8.3757
0.5150	-2.2238	8.3851
0.5160	-2.1984	8.3958
0.5170	-2.1730	8.4078
0.5180	-2.1476	8.4213
0.5190	-2.1222	8.4363
0.5200	-2.0968	8.4529
0.5210	-2.0714	8.4710
0.5220	-2.0460	8.4908
0.5230	-2.0206	8.5124
0.5240	-1.9952	8.5358
0.5250	-1.9698	8.5610
0.5260	-1.9444	8.5876
0.5270	-1.9190	8.6154
0.5280	-1.8936	8.6442
0.5290	-1.8682	8.6739
0.5300	-1.8428	8.7045
0.5310	-1.8174	8.7360
0.5320	-1.7920	8.7681
0.5330	-1.7666	8.8009
0.5340	-1.7412	8.8346
0.5350	-1.7158	8.8692
0.5360	-1.6904	8.9049
0.5370	-1.6650	8.9419
0.5380	-1.6396	8.9805
0.5390	-1.6142	9.0208
0.5400	-1.5888	9.0629
0.5410	-1.5634	9.1070
0.5420	-1.5380	9.1537
0.5430	-1.5126	9.2037
0.5440	-1.4872	9.2576
0.5450	-1.4618	9.3162
0.5460	-1.4364	9.3803
0.5470	-1.4110	9.4506
0.5480	-1.3856	9.5286
0.5490	-1.3602	9.6154
0.5500	-1.3348	9.7126
0.5510	-1.3094	9.8217
0.5520	-1.2840	9.9443
0.5530	-1.2586	10.0822
0.5540	-1.2332	10.2373
0.5550	-1.2078	10.4114
0.5560	-1.1824	10.6066
0.5570	-1.1570	10.8249
0.5580	-1.1316	11.0680
0.5590	-1.1062	11.3377
0.5600	-1.0808	11.6351
0.5610	-1.0554	11.9605
0.5620	-1.0300	12.3127
0.5630	-1.0046	12.6909
0.5640	-0.9792	13.0944
0.5650	-0.9538	13.5231
0.5660	-0.9284	13.9766
0.5670	-0.9030	14.4544
0.5680	-0.8776	14.9561
0.5690	-0.8522	15.4814
0.5700	-0.8268	16.0303
0.5710	-0.8014	16.6026
0.5720	-0.7760	17.1981
0.5730	-0.7506	17.8161
0.5740	-0.7252	18.4557
0.5750	-0.6998	19.1157
0.5760	-0.6744	19.7945
0.5770	-0.6490	20.4911
0.5780	-0.6236	21.2047
0.5790	-0.5982	21.9345
0.5800	-0.5728	22.6780
0.5810	-0.5474	23.4287
0.5820	-0.5220	24.1805
0.5830	-0.4966	24.9305
0.5840	-0.4712	25.6791
0.5850	-0.4458	26.4285
0.5860	-0.4204	27.1811
0.5870	-0.3950	27.9394
0.5880	-0.3696	28.7059
0.5890	-0.3442	29.4828
0.5900	-0.3188	30.2719
0.5910	-0.2934	31.0749
0.5920	-0.2680	31.8926
0.5930	-0.2426	32.7239
0.5940	-0.2172	33.5650
0.5950	-0.1918	34.4123
0.5960	-0.1664	35.2639
0.5970	-0.1410	36.1197
0.5980	-0.1156	36.9808
0.5990	-0.0902	37.8486
0.6000	-0.0648	38.7246
0.6010	-0.0394	39.6100
0.6020	-0.0140	40.5049
0.6030	0.0114	41.4087
0.6040	0.0368	42.3202
0.6050	0.0622	43.2376
0.6060	0.0875	44.1593
0.6070	0.1129	45.0834
0.6080	0.1383	46.0065
0.6090	0.1637	46.9170
0.6100	0.1891	47.7954
0.6110	0.2145	48.6211
0.6120	0.2399	49.3774
0.6130	0.2653	50.0510
0.6140	0.2907	50.6330
0.6150	0.3161	51.1199
0.6160	0.3415	51.5118
0.6170	0.3669	51.8091
0.6180	0.3923	52.0119
0.6190	0.4177	52.1204
0.6200	0.4431	52.1340
0.6210	0.4685	52.0523
0.6220	0.4939	51.8773
0.6230	0.5193	51.6131
0.6240	0.5447	51.2649
0.6250	0.5701	50.8381
0.6260	0.5954	50.3374
0.6270	0.6208	49.7676
0.6280	0.6462	49.1342
0.6290	0.6716	48.4436
0.6300	0.6970	47.7026
0.6310	0.7224	46.9180
0.6320	0.7478	46.0958
0.6330	0.7732	45.2421
0.6340	0.7986	44.3620
0.6350	0.8240	43.4608
0.6360	0.8494	42.5432
0.6370	0.8748	41.6137
0.6380	0.9002	40.6761
0.6390	0.9256	39.7341
0.6400	0.9510	38.7910
0.6410	0.9764	37.8499
0.6420	1.0018	36.9139
0.6430	1.0272	35.9858
0.6440	1.0526	35.0678
0.6450	1.0781	34.1619
0.6460	1.1035	33.2697
0.6470	1.1289	32.3931
0.6480	1.1543	31.5336
0.6490	1.1797	30.6926
0.6500	1.2051	29.8711
0.6510	1.2305	29.0702
0.6520	1.2559	28.2907
0.6530	1.2813	27.5335
0.6540	1.3067	26.7991
0.6550	1.3321	26.0879
0.6560	1.3575	25.4001
0.6570	1.3829	24.7358
0.6580	1.4083	24.0949
0.6590	1.4337	23.4776
0.6600	1.4592	22.8836
0.6610	1.4846	22.3130
0.6620	1.5100	21.7654
0.6630	1.5354	21.2407
0.6640	1.5608	20.7385
0.6650	1.5862	20.2588
0.6660	1.6116	19.8012
0.6670	1.6370	19.3651
0.6680	1.6624	18.9498
0.6690	1.6878	18.5549
0.6700	1.7132	18.1801
0.6710	1.7386	17.8249
0.6720	1.7641	17.4891
0.6730	1.7895	17.1721
0.6740	1.8149	16.8731
0.6750	1.8403	16.5916
0.6760	1.8657	16.3268
0.6770	1.8911	16.0778
0.6780	1.9165	15.8436
0.6790	1.9419	15.6236
0.6800	1.9673	15.4169
0.6810	1.9927	15.2230
0.6820	2.0181	15.0414
0.6830	2.0435	14.8716
0.6840	2.0689	14.7131
0.6850	2.0943	14.5657
0.6860	2.1197	14.4287
0.6870	2.1451	14.3018
0.6880	2.1705	14.1845
0.6890	2.1959	14.0760
0.6900	2.2213	13.9755
0.6910	2.2467	13.8824
0.6920	2.2721	13.7959
0.6930	2.2975	13.7155
0.6940	2.3229	13.6408
0.6950	2.3483	13.5712
0.6960	2.3737	13.5066
0.6970	2.3991	13.4468
0.6980	2.4246	13.3913
0.6990	2.4500	13.3397
0.7000	2.4754	13.2918
0.7010	2.5008	13.2473
0.7020	2.5262	13.2058
0.7030	2.5516	13.1669
0.7040	2.5770	13.1299
0.7050	2.6024	13.0945
0.7060	2.6278	13.0603
0.7070	2.6532	13.0270
0.7080	2.6786	12.9946
0.7090	2.7040	12.9628
0.7100	2.7294	12.9315
0.7110	2.7548	12.9005
0.7120	2.7802	12.8696
0.7130	2.8056	12.8389
0.7140	2.8310	12.8083
0.7150	2.8564	12.7779
0.7160	2.8818	12.7476
0.7170	2.9072	12.7175
0.7180	2.9326	12.6875
0.7190	2.9580	12.6575
0.7200	2.9834	12.6272
0.7210	3.0088	12.5967
0.7220	3.0342	12.5658
0.7230	3.0596	12.5345
0.7240	3.0850	12.5031
0.7250	3.1104	12.4719
0.7260	3.1358	12.4410
0.7270	3.1612	12.4104
0.7280	3.1866	12.3800
0.7290	3.2120	12.3497
0.7300	3.2374	12.3200
0.7310	3.2628	12.2905
0.7320	3.2882	12.2615
0.7330	3.3136	12.2328
0.7340	3.3390	12.2044
0.7350	3.3644	12.1762
0.7360	3.3898	12.1482
0.7370	3.4152	12.1203
0.7380	3.4406	12.0927
0.7390	3.4660	12.0652
0.7400	3.4914	12.0379
0.7410	3.5168	12.0107
0.7420	3.5422	11.9838
0.7430	3.5676	11.9572
0.7440	3.5929	11.9310
0.7450	3.6183	11.9050
0.7460	3.6437	11.8793
0.7470	3.6691	11.8538
0.7480	3.6945	11.8284
0.7490	3.7199	11.8032
0.7500	3.7453	11.7784
0.7510	3.7707	11.7539
0.7520	3.7961	11.7298
0.7530	3.8215	11.7060
0.7540	3.8469	11.6826
0.7550	3.8723	11.6594
0.7560	3.8977	11.6364
0.7570	3.9231	11.6134
0.7580	3.9485	11.5906
0.7590	3.9739	11.5679
0.7600	3.9993	11.5457
0.7610	4.0247	11.5238
0.7620	4.0501	11.5022
0.7630	4.0755	11.4809
0.7640	4.1009	11.4600
0.7650	4.1263	11.4393
0.7660	4.1517	11.4191
0.7670	4.1771	11.3993
0.7680	4.2025	11.3800
0.7690	4.2279	11.3613
0.7700	4.2533	11.3432
0.7710	4.2787	11.3255
0.7720	4.3040	11.3081
0.7730	4.3294	11.2912
0.7740	4.3548	11.2747
0.7750	4.3802	11.2586
0.7760	4.4056	11.2427
0.7770	4.4310	11.2272
0.7780	4.4564	11.2117
0.7790	4.4818	11.1963
0.7800	4.5072	11.1811
0.7810	4.5326	11.1658
0.7820	4.5580	11.1504
0.7830	4.5834	11.1345
0.7840	4.6088	11.1174
0.7850	4.6341	11.0985
0.7860	4.6595	11.0767
0.7870	4.6848	11.0510
0.7880	4.7101	11.0211
0.7890	4.7352	10.9869
0.7900	4.7603	10.9492
0.7910	4.7852	10.9089
0.7920	4.8100	10.8666
0.7930	4.8346	10.8226
0.7940	4.8589	10.7770
0.7950	4.8830	10.7296
0.7960	4.9067	10.6804
0.7970	4.9302	10.6297
0.7980	4.9532	10.5777
0.7990	4.9759	10.5246
0.8000	4.9981	10.4703
0.8010	5.0200	10.4145
0.8020	5.0413	10.3571
