# Supplementary material for: Integrated Puncture Score: force–displacement weighted rind penetration tests improve stalk lodging resistance estimations in maize
Source: Plant Methods. 2020 Aug 15;16:113. doi: 10.1186/s13007-020-00654-w (PMC7429900; doi:10.1186/s13007-020-00654-w)
Supplement: Supplementary file 3 — Additional file 3. Example force-displacement data from a puncture test. [file 13007_2020_654_MOESM3_ESM.csv]

Time	Displacement	Force
(s)	(mm)	(N)
0.0000	-17.1934	-0.0001
0.0010	-17.1934	0.0002
0.0020	-17.1934	0.0007
0.0030	-17.1934	0.0013
0.0040	-17.1934	0.0025
0.0050	-17.1934	0.0046
0.0060	-17.1933	0.0078
0.0070	-17.1933	0.0120
0.0080	-17.1933	0.0174
0.0090	-17.1932	0.0239
0.0100	-17.1930	0.0317
0.0110	-17.1928	0.0405
0.0120	-17.1925	0.0502
0.0130	-17.1922	0.0605
0.0140	-17.1917	0.0712
0.0150	-17.1911	0.0819
0.0160	-17.1903	0.0925
0.0170	-17.1894	0.1031
0.0180	-17.1884	0.1139
0.0190	-17.1871	0.1251
0.0200	-17.1856	0.1367
0.0210	-17.1839	0.1485
0.0220	-17.1819	0.1603
0.0230	-17.1797	0.1721
0.0240	-17.1771	0.1836
0.0250	-17.1743	0.1950
0.0260	-17.1712	0.2063
0.0270	-17.1677	0.2175
0.0280	-17.1638	0.2285
0.0290	-17.1596	0.2392
0.0300	-17.1550	0.2497
0.0310	-17.1499	0.2599
0.0320	-17.1445	0.2699
0.0330	-17.1386	0.2796
0.0340	-17.1322	0.2889
0.0350	-17.1254	0.2977
0.0360	-17.1181	0.3060
0.0370	-17.1104	0.3138
0.0380	-17.1021	0.3213
0.0390	-17.0933	0.3286
0.0400	-17.0839	0.3358
0.0410	-17.0740	0.3427
0.0420	-17.0636	0.3490
0.0430	-17.0526	0.3546
0.0440	-17.0411	0.3598
0.0450	-17.0290	0.3662
0.0460	-17.0162	0.3767
0.0470	-17.0029	0.3966
0.0480	-16.9890	0.4322
0.0490	-16.9745	0.4904
0.0500	-16.9594	0.5781
0.0510	-16.9437	0.7015
0.0520	-16.9274	0.8654
0.0530	-16.9105	1.0737
0.0540	-16.8930	1.3298
0.0550	-16.8750	1.6363
0.0560	-16.8565	1.9949
0.0570	-16.8374	2.4067
0.0580	-16.8179	2.8721
0.0590	-16.7979	3.3912
0.0600	-16.7775	3.9637
0.0610	-16.7566	4.5880
0.0620	-16.7354	5.2618
0.0630	-16.7138	5.9819
0.0640	-16.6919	6.7449
0.0650	-16.6696	7.5475
0.0660	-16.6471	8.3869
0.0670	-16.6243	9.2604
0.0680	-16.6012	10.1652
0.0690	-16.5780	11.0978
0.0700	-16.5545	12.0545
0.0710	-16.5308	13.0320
0.0720	-16.5070	14.0277
0.0730	-16.4830	15.0391
0.0740	-16.4588	16.0643
0.0750	-16.4345	17.1016
0.0760	-16.4101	18.1490
0.0770	-16.3856	19.2051
0.0780	-16.3610	20.2680
0.0790	-16.3362	21.3362
0.0800	-16.3114	22.4082
0.0810	-16.2865	23.4825
0.0820	-16.2616	24.5577
0.0830	-16.2365	25.6326
0.0840	-16.2114	26.7060
0.0850	-16.1863	27.7768
0.0860	-16.1611	28.8437
0.0870	-16.1358	29.9057
0.0880	-16.1105	30.9618
0.0890	-16.0851	32.0108
0.0900	-16.0597	33.0521
0.0910	-16.0343	34.0847
0.0920	-16.0088	35.1083
0.0930	-15.9832	36.1227
0.0940	-15.9577	37.1277
0.0950	-15.9320	38.1230
0.0960	-15.9064	39.1081
0.0970	-15.8807	40.0827
0.0980	-15.8550	41.0458
0.0990	-15.8293	41.9969
0.1000	-15.8035	42.9353
0.1010	-15.7778	43.8607
0.1020	-15.7519	44.7727
0.1030	-15.7261	45.6713
0.1040	-15.7003	46.5563
0.1050	-15.6744	47.4273
0.1060	-15.6485	48.2838
0.1070	-15.6226	49.1251
0.1080	-15.5967	49.9502
0.1090	-15.5708	50.7588
0.1100	-15.5449	51.5504
0.1110	-15.5189	52.3249
0.1120	-15.4930	53.0825
0.1130	-15.4671	53.8229
0.1140	-15.4411	54.5463
0.1150	-15.4152	55.2535
0.1160	-15.3892	55.9449
0.1170	-15.3633	56.6210
0.1180	-15.3374	57.2820
0.1190	-15.3114	57.9277
0.1200	-15.2855	58.5578
0.1210	-15.2596	59.1721
0.1220	-15.2337	59.7692
0.1230	-15.2078	60.3464
0.1240	-15.1819	60.9015
0.1250	-15.1561	61.4341
0.1260	-15.1302	61.9448
0.1270	-15.1043	62.4351
0.1280	-15.0785	62.9068
0.1290	-15.0527	63.3617
0.1300	-15.0269	63.8006
0.1310	-15.0011	64.2224
0.1320	-14.9753	64.6245
0.1330	-14.9495	65.0051
0.1340	-14.9238	65.3637
0.1350	-14.8980	65.7005
0.1360	-14.8723	66.0167
0.1370	-14.8466	66.3141
0.1380	-14.8209	66.5947
0.1390	-14.7952	66.8606
0.1400	-14.7695	67.1135
0.1410	-14.7439	67.3544
0.1420	-14.7182	67.5844
0.1430	-14.6926	67.8044
0.1440	-14.6670	68.0150
0.1450	-14.6414	68.2155
0.1460	-14.6158	68.4036
0.1470	-14.5902	68.5759
0.1480	-14.5646	68.7292
0.1490	-14.5390	68.8616
0.1500	-14.5135	68.9723
0.1510	-14.4879	69.0619
0.1520	-14.4624	69.1321
0.1530	-14.4368	69.1850
0.1540	-14.4113	69.2218
0.1550	-14.3858	69.2423
0.1560	-14.3603	69.2452
0.1570	-14.3348	69.2300
0.1580	-14.3093	69.1978
0.1590	-14.2838	69.1507
0.1600	-14.2583	69.0875
0.1610	-14.2328	68.9936
0.1620	-14.2074	68.8373
0.1630	-14.1819	68.5881
0.1640	-14.1564	68.2305
0.1650	-14.1309	67.7636
0.1660	-14.1055	67.1952
0.1670	-14.0800	66.5362
0.1680	-14.0546	65.7972
0.1690	-14.0291	64.9877
0.1700	-14.0036	64.1164
0.1710	-13.9782	63.1918
0.1720	-13.9527	62.2219
0.1730	-13.9273	61.2142
0.1740	-13.9018	60.1759
0.1750	-13.8764	59.1140
0.1760	-13.8509	58.0354
0.1770	-13.8255	56.9462
0.1780	-13.8000	55.8521
0.1790	-13.7746	54.7582
0.1800	-13.7492	53.6688
0.1810	-13.7237	52.5845
0.1820	-13.6983	51.4972
0.1830	-13.6728	50.3957
0.1840	-13.6474	49.2733
0.1850	-13.6219	48.1297
0.1860	-13.5965	46.9686
0.1870	-13.5711	45.7958
0.1880	-13.5456	44.6165
0.1890	-13.5202	43.4358
0.1900	-13.4948	42.2582
0.1910	-13.4693	41.0876
0.1920	-13.4439	39.9276
0.1930	-13.4184	38.7814
0.1940	-13.3930	37.6524
0.1950	-13.3675	36.5437
0.1960	-13.3421	35.4582
0.1970	-13.3167	34.3983
0.1980	-13.2912	33.3658
0.1990	-13.2658	32.3622
0.2000	-13.2404	31.3887
0.2010	-13.2149	30.4465
0.2020	-13.1895	29.5360
0.2030	-13.1640	28.6579
0.2040	-13.1386	27.8126
0.2050	-13.1132	27.0004
0.2060	-13.0877	26.2215
0.2070	-13.0623	25.4758
0.2080	-13.0369	24.7632
0.2090	-13.0114	24.0833
0.2100	-12.9860	23.4357
0.2110	-12.9606	22.8197
0.2120	-12.9352	22.2348
0.2130	-12.9097	21.6802
0.2140	-12.8843	21.1551
0.2150	-12.8589	20.6590
0.2160	-12.8335	20.1911
0.2170	-12.8080	19.7509
0.2180	-12.7826	19.3375
0.2190	-12.7572	18.9501
0.2200	-12.7318	18.5876
0.2210	-12.7063	18.2491
0.2220	-12.6809	17.9338
0.2230	-12.6555	17.6408
0.2240	-12.6301	17.3693
0.2250	-12.6047	17.1186
0.2260	-12.5792	16.8878
0.2270	-12.5538	16.6763
0.2280	-12.5284	16.4830
0.2290	-12.5030	16.3070
0.2300	-12.4775	16.1472
0.2310	-12.4521	16.0026
0.2320	-12.4267	15.8721
0.2330	-12.4013	15.7547
0.2340	-12.3758	15.6499
0.2350	-12.3504	15.5567
0.2360	-12.3250	15.4742
0.2370	-12.2996	15.4016
0.2380	-12.2742	15.3379
0.2390	-12.2488	15.2823
0.2400	-12.2233	15.2341
0.2410	-12.1979	15.1926
0.2420	-12.1725	15.1572
0.2430	-12.1471	15.1268
0.2440	-12.1217	15.1006
0.2450	-12.0963	15.0780
0.2460	-12.0709	15.0588
0.2470	-12.0455	15.0426
0.2480	-12.0200	15.0292
0.2490	-11.9946	15.0181
0.2500	-11.9692	15.0092
0.2510	-11.9438	15.0020
0.2520	-11.9184	14.9963
0.2530	-11.8930	14.9918
0.2540	-11.8676	14.9880
0.2550	-11.8422	14.9843
0.2560	-11.8168	14.9800
0.2570	-11.7914	14.9744
0.2580	-11.7660	14.9669
0.2590	-11.7405	14.9571
0.2600	-11.7151	14.9445
0.2610	-11.6897	14.9288
0.2620	-11.6643	14.9093
0.2630	-11.6389	14.8858
0.2640	-11.6135	14.8578
0.2650	-11.5881	14.8255
0.2660	-11.5627	14.7889
0.2670	-11.5373	14.7483
0.2680	-11.5119	14.7041
0.2690	-11.4865	14.6565
0.2700	-11.4611	14.6061
0.2710	-11.4357	14.5531
0.2720	-11.4103	14.4977
0.2730	-11.3849	14.4405
0.2740	-11.3595	14.3814
0.2750	-11.3341	14.3208
0.2760	-11.3087	14.2589
0.2770	-11.2833	14.1959
0.2780	-11.2579	14.1319
0.2790	-11.2325	14.0669
0.2800	-11.2071	14.0010
0.2810	-11.1817	13.9342
0.2820	-11.1563	13.8661
0.2830	-11.1309	13.7969
0.2840	-11.1055	13.7267
0.2850	-11.0801	13.6555
0.2860	-11.0547	13.5835
0.2870	-11.0292	13.5108
0.2880	-11.0038	13.4377
0.2890	-10.9784	13.3643
0.2900	-10.9530	13.2906
0.2910	-10.9276	13.2164
0.2920	-10.9022	13.1418
0.2930	-10.8768	13.0670
0.2940	-10.8514	12.9919
0.2950	-10.8260	12.9168
0.2960	-10.8006	12.8417
0.2970	-10.7752	12.7666
0.2980	-10.7498	12.6914
0.2990	-10.7244	12.6159
0.3000	-10.6990	12.5403
0.3010	-10.6736	12.4647
0.3020	-10.6482	12.3893
0.3030	-10.6228	12.3141
0.3040	-10.5974	12.2387
0.3050	-10.5720	12.1630
0.3060	-10.5466	12.0872
0.3070	-10.5212	12.0111
0.3080	-10.4958	11.9347
0.3090	-10.4704	11.8584
0.3100	-10.4450	11.7822
0.3110	-10.4196	11.7065
0.3120	-10.3942	11.6319
0.3130	-10.3688	11.5587
0.3140	-10.3434	11.4872
0.3150	-10.3180	11.4178
0.3160	-10.2926	11.3507
0.3170	-10.2672	11.2860
0.3180	-10.2418	11.2237
0.3190	-10.2164	11.1639
0.3200	-10.1910	11.1065
0.3210	-10.1656	11.0513
0.3220	-10.1402	10.9983
0.3230	-10.1148	10.9472
0.3240	-10.0894	10.8980
0.3250	-10.0640	10.8508
0.3260	-10.0386	10.8055
0.3270	-10.0132	10.7617
0.3280	-9.9878	10.7194
0.3290	-9.9624	10.6788
0.3300	-9.9370	10.6399
0.3310	-9.9116	10.6032
0.3320	-9.8862	10.5687
0.3330	-9.8608	10.5366
0.3340	-9.8354	10.5070
0.3350	-9.8100	10.4798
0.3360	-9.7846	10.4547
0.3370	-9.7592	10.4316
0.3380	-9.7338	10.4102
0.3390	-9.7084	10.3904
0.3400	-9.6830	10.3722
0.3410	-9.6576	10.3552
0.3420	-9.6322	10.3392
0.3430	-9.6068	10.3242
0.3440	-9.5814	10.3099
0.3450	-9.5560	10.2963
0.3460	-9.5306	10.2835
0.3470	-9.5052	10.2719
0.3480	-9.4798	10.2614
0.3490	-9.4544	10.2521
0.3500	-9.4290	10.2436
0.3510	-9.4036	10.2361
0.3520	-9.3782	10.2296
0.3530	-9.3528	10.2241
0.3540	-9.3274	10.2194
0.3550	-9.3020	10.2151
0.3560	-9.2766	10.2112
0.3570	-9.2512	10.2075
0.3580	-9.2258	10.2041
0.3590	-9.2004	10.2011
0.3600	-9.1750	10.1985
0.3610	-9.1496	10.1964
0.3620	-9.1242	10.1944
0.3630	-9.0988	10.1921
0.3640	-9.0734	10.1893
0.3650	-9.0480	10.1861
0.3660	-9.0226	10.1826
0.3670	-8.9972	10.1790
0.3680	-8.9718	10.1755
0.3690	-8.9464	10.1721
0.3700	-8.9210	10.1688
0.3710	-8.8956	10.1656
0.3720	-8.8702	10.1626
0.3730	-8.8448	10.1597
0.3740	-8.8194	10.1570
0.3750	-8.7940	10.1546
0.3760	-8.7686	10.1526
0.3770	-8.7432	10.1508
0.3780	-8.7178	10.1494
0.3790	-8.6924	10.1482
0.3800	-8.6670	10.1472
0.3810	-8.6416	10.1466
0.3820	-8.6162	10.1462
0.3830	-8.5908	10.1462
0.3840	-8.5654	10.1464
0.3850	-8.5400	10.1469
0.3860	-8.5146	10.1477
0.3870	-8.4891	10.1490
0.3880	-8.4637	10.1506
0.3890	-8.4383	10.1525
0.3900	-8.4129	10.1548
0.3910	-8.3875	10.1574
0.3920	-8.3621	10.1600
0.3930	-8.3367	10.1627
0.3940	-8.3113	10.1657
0.3950	-8.2859	10.1691
0.3960	-8.2605	10.1731
0.3970	-8.2351	10.1777
0.3980	-8.2097	10.1831
0.3990	-8.1843	10.1892
0.4000	-8.1589	10.1959
0.4010	-8.1335	10.2036
0.4020	-8.1081	10.2122
0.4030	-8.0827	10.2216
0.4040	-8.0573	10.2321
0.4050	-8.0318	10.2437
0.4060	-8.0064	10.2566
0.4070	-7.9810	10.2705
0.4080	-7.9556	10.2855
0.4090	-7.9302	10.3014
0.4100	-7.9048	10.3181
0.4110	-7.8794	10.3351
0.4120	-7.8540	10.3523
0.4130	-7.8286	10.3694
0.4140	-7.8032	10.3864
0.4150	-7.7778	10.4034
0.4160	-7.7524	10.4202
0.4170	-7.7270	10.4369
0.4180	-7.7016	10.4533
0.4190	-7.6762	10.4694
0.4200	-7.6508	10.4848
0.4210	-7.6254	10.4995
0.4220	-7.6000	10.5137
0.4230	-7.5746	10.5278
0.4240	-7.5492	10.5422
0.4250	-7.5238	10.5568
0.4260	-7.4984	10.5717
0.4270	-7.4730	10.5869
0.4280	-7.4476	10.6021
0.4290	-7.4222	10.6171
0.4300	-7.3968	10.6316
0.4310	-7.3714	10.6455
0.4320	-7.3460	10.6586
0.4330	-7.3206	10.6706
0.4340	-7.2952	10.6818
0.4350	-7.2698	10.6920
0.4360	-7.2444	10.7016
0.4370	-7.2190	10.7107
0.4380	-7.1936	10.7192
0.4390	-7.1682	10.7274
0.4400	-7.1428	10.7355
0.4410	-7.1174	10.7433
0.4420	-7.0920	10.7510
0.4430	-7.0666	10.7585
0.4440	-7.0412	10.7657
0.4450	-7.0158	10.7726
0.4460	-6.9904	10.7791
0.4470	-6.9650	10.7852
0.4480	-6.9396	10.7908
0.4490	-6.9142	10.7958
0.4500	-6.8888	10.8001
0.4510	-6.8634	10.8038
0.4520	-6.8380	10.8064
0.4530	-6.8127	10.8079
0.4540	-6.7873	10.8084
0.4550	-6.7619	10.8080
0.4560	-6.7365	10.8071
0.4570	-6.7111	10.8058
0.4580	-6.6857	10.8046
0.4590	-6.6603	10.8036
0.4600	-6.6349	10.8032
0.4610	-6.6095	10.8033
0.4620	-6.5841	10.8039
0.4630	-6.5587	10.8053
0.4640	-6.5333	10.8075
0.4650	-6.5079	10.8105
0.4660	-6.4825	10.8141
0.4670	-6.4571	10.8182
0.4680	-6.4317	10.8228
0.4690	-6.4063	10.8282
0.4700	-6.3809	10.8346
0.4710	-6.3555	10.8422
0.4720	-6.3301	10.8510
0.4730	-6.3047	10.8607
0.4740	-6.2793	10.8706
0.4750	-6.2539	10.8802
0.4760	-6.2285	10.8893
0.4770	-6.2031	10.8980
0.4780	-6.1777	10.9067
0.4790	-6.1523	10.9155
0.4800	-6.1269	10.9243
0.4810	-6.1015	10.9331
0.4820	-6.0761	10.9418
0.4830	-6.0507	10.9501
0.4840	-6.0252	10.9579
0.4850	-5.9998	10.9650
0.4860	-5.9744	10.9717
0.4870	-5.9490	10.9782
0.4880	-5.9236	10.9849
0.4890	-5.8982	10.9917
0.4900	-5.8728	10.9982
0.4910	-5.8474	11.0044
0.4920	-5.8220	11.0102
0.4930	-5.7966	11.0156
0.4940	-5.7712	11.0207
0.4950	-5.7458	11.0256
0.4960	-5.7204	11.0306
0.4970	-5.6950	11.0356
0.4980	-5.6696	11.0402
0.4990	-5.6442	11.0440
0.5000	-5.6188	11.0468
0.5010	-5.5934	11.0487
0.5020	-5.5680	11.0501
0.5030	-5.5426	11.0513
0.5040	-5.5172	11.0527
0.5050	-5.4918	11.0549
0.5060	-5.4664	11.0579
0.5070	-5.4410	11.0618
0.5080	-5.4156	11.0665
0.5090	-5.3902	11.0722
0.5100	-5.3648	11.0789
0.5110	-5.3394	11.0867
0.5120	-5.3140	11.0957
0.5130	-5.2886	11.1059
0.5140	-5.2632	11.1173
0.5150	-5.2378	11.1295
0.5160	-5.2124	11.1424
0.5170	-5.1870	11.1560
0.5180	-5.1616	11.1705
0.5190	-5.1362	11.1859
0.5200	-5.1108	11.2023
0.5210	-5.0854	11.2197
0.5220	-5.0600	11.2379
0.5230	-5.0346	11.2568
0.5240	-5.0092	11.2764
0.5250	-4.9838	11.2965
0.5260	-4.9584	11.3172
0.5270	-4.9330	11.3382
0.5280	-4.9076	11.3591
0.5290	-4.8822	11.3795
0.5300	-4.8568	11.3990
0.5310	-4.8314	11.4175
0.5320	-4.8060	11.4352
0.5330	-4.7806	11.4523
0.5340	-4.7552	11.4690
0.5350	-4.7298	11.4855
0.5360	-4.7044	11.5018
0.5370	-4.6790	11.5180
0.5380	-4.6536	11.5340
0.5390	-4.6282	11.5498
0.5400	-4.6029	11.5654
0.5410	-4.5775	11.5808
0.5420	-4.5521	11.5960
0.5430	-4.5267	11.6110
0.5440	-4.5013	11.6258
0.5450	-4.4759	11.6405
0.5460	-4.4505	11.6551
0.5470	-4.4251	11.6698
0.5480	-4.3997	11.6847
0.5490	-4.3743	11.6999
0.5500	-4.3489	11.7158
0.5510	-4.3235	11.7321
0.5520	-4.2981	11.7489
0.5530	-4.2727	11.7659
0.5540	-4.2473	11.7831
0.5550	-4.2219	11.8009
0.5560	-4.1965	11.8193
0.5570	-4.1711	11.8386
0.5580	-4.1457	11.8588
0.5590	-4.1203	11.8795
0.5600	-4.0949	11.9004
0.5610	-4.0696	11.9210
0.5620	-4.0442	11.9407
0.5630	-4.0188	11.9595
0.5640	-3.9934	11.9777
0.5650	-3.9680	11.9952
0.5660	-3.9426	12.0123
0.5670	-3.9172	12.0289
0.5680	-3.8918	12.0447
0.5690	-3.8664	12.0594
0.5700	-3.8410	12.0731
0.5710	-3.8156	12.0859
0.5720	-3.7902	12.0977
0.5730	-3.7648	12.1087
0.5740	-3.7394	12.1186
0.5750	-3.7140	12.1272
0.5760	-3.6886	12.1341
0.5770	-3.6632	12.1391
0.5780	-3.6378	12.1422
0.5790	-3.6124	12.1434
0.5800	-3.5870	12.1427
0.5810	-3.5616	12.1404
0.5820	-3.5362	12.1366
0.5830	-3.5108	12.1314
0.5840	-3.4854	12.1251
0.5850	-3.4600	12.1179
0.5860	-3.4346	12.1101
0.5870	-3.4091	12.1019
0.5880	-3.3837	12.0932
0.5890	-3.3583	12.0844
0.5900	-3.3329	12.0753
0.5910	-3.3075	12.0663
0.5920	-3.2821	12.0576
0.5930	-3.2567	12.0493
0.5940	-3.2313	12.0416
0.5950	-3.2059	12.0346
0.5960	-3.1805	12.0283
0.5970	-3.1551	12.0230
0.5980	-3.1297	12.0185
0.5990	-3.1043	12.0147
0.6000	-3.0789	12.0114
0.6010	-3.0535	12.0084
0.6020	-3.0281	12.0057
0.6030	-3.0027	12.0034
0.6040	-2.9773	12.0018
0.6050	-2.9519	12.0008
0.6060	-2.9265	12.0006
0.6070	-2.9011	12.0012
0.6080	-2.8757	12.0028
0.6090	-2.8503	12.0057
0.6100	-2.8249	12.0100
0.6110	-2.7995	12.0158
0.6120	-2.7741	12.0231
0.6130	-2.7487	12.0317
0.6140	-2.7233	12.0418
0.6150	-2.6979	12.0530
0.6160	-2.6725	12.0657
0.6170	-2.6471	12.0798
0.6180	-2.6217	12.0955
0.6190	-2.5963	12.1128
0.6200	-2.5709	12.1312
0.6210	-2.5455	12.1505
0.6220	-2.5201	12.1706
0.6230	-2.4947	12.1913
0.6240	-2.4692	12.2125
0.6250	-2.4438	12.2343
0.6260	-2.4184	12.2565
0.6270	-2.3930	12.2794
0.6280	-2.3676	12.3028
0.6290	-2.3422	12.3266
0.6300	-2.3168	12.3507
0.6310	-2.2914	12.3754
0.6320	-2.2660	12.4008
0.6330	-2.2406	12.4270
0.6340	-2.2152	12.4533
0.6350	-2.1898	12.4786
0.6360	-2.1644	12.5022
0.6370	-2.1390	12.5239
0.6380	-2.1136	12.5438
0.6390	-2.0882	12.5624
0.6400	-2.0628	12.5800
0.6410	-2.0374	12.5973
0.6420	-2.0120	12.6151
0.6430	-1.9866	12.6341
0.6440	-1.9612	12.6548
0.6450	-1.9358	12.6779
0.6460	-1.9104	12.7038
0.6470	-1.8850	12.7335
0.6480	-1.8596	12.7677
0.6490	-1.8342	12.8072
0.6500	-1.8088	12.8531
0.6510	-1.7834	12.9060
0.6520	-1.7580	12.9668
0.6530	-1.7326	13.0363
0.6540	-1.7072	13.1154
0.6550	-1.6818	13.2049
0.6560	-1.6564	13.3057
0.6570	-1.6310	13.4184
0.6580	-1.6056	13.5438
0.6590	-1.5802	13.6825
0.6600	-1.5548	13.8354
0.6610	-1.5294	14.0038
0.6620	-1.5040	14.1893
0.6630	-1.4786	14.3935
0.6640	-1.4532	14.6187
0.6650	-1.4279	14.8675
0.6660	-1.4025	15.1424
0.6670	-1.3771	15.4453
0.6680	-1.3517	15.7771
0.6690	-1.3263	16.1383
0.6700	-1.3009	16.5296
0.6710	-1.2755	16.9514
0.6720	-1.2501	17.4040
0.6730	-1.2247	17.8873
0.6740	-1.1993	18.4010
0.6750	-1.1739	18.9453
0.6760	-1.1485	19.5208
0.6770	-1.1231	20.1274
0.6780	-1.0977	20.7653
0.6790	-1.0723	21.4340
0.6800	-1.0469	22.1331
0.6810	-1.0215	22.8623
0.6820	-0.9961	23.6210
0.6830	-0.9707	24.4085
0.6840	-0.9453	25.2239
0.6850	-0.9199	26.0654
0.6860	-0.8945	26.9303
0.6870	-0.8691	27.8156
0.6880	-0.8437	28.7192
0.6890	-0.8183	29.6398
0.6900	-0.7929	30.5769
0.6910	-0.7675	31.5305
0.6920	-0.7421	32.4986
0.6930	-0.7167	33.4730
0.6940	-0.6913	34.4401
0.6950	-0.6659	35.3903
0.6960	-0.6405	36.3208
0.6970	-0.6151	37.2330
0.6980	-0.5897	38.1303
0.6990	-0.5643	39.0161
0.7000	-0.5389	39.8938
0.7010	-0.5135	40.7661
0.7020	-0.4881	41.6336
0.7030	-0.4627	42.4967
0.7040	-0.4373	43.3567
0.7050	-0.4119	44.2158
0.7060	-0.3865	45.0765
0.7070	-0.3611	45.9411
0.7080	-0.3357	46.8115
0.7090	-0.3103	47.6893
0.7100	-0.2849	48.5763
0.7110	-0.2595	49.4740
0.7120	-0.2341	50.3835
0.7130	-0.2087	51.3050
0.7140	-0.1833	52.2386
0.7150	-0.1579	53.1840
0.7160	-0.1326	54.1417
0.7170	-0.1072	55.1123
0.7180	-0.0818	56.0957
0.7190	-0.0564	57.0892
0.7200	-0.0310	58.0887
0.7210	-0.0056	59.0887
0.7220	0.0198	60.0795
0.7230	0.0452	61.0430
0.7240	0.0706	61.9553
0.7250	0.0960	62.7935
0.7260	0.1214	63.5321
0.7270	0.1468	64.1452
0.7280	0.1722	64.6180
0.7290	0.1976	64.9465
0.7300	0.2230	65.1332
0.7310	0.2484	65.1847
0.7320	0.2737	65.1102
0.7330	0.2991	64.9202
0.7340	0.3245	64.6239
0.7350	0.3499	64.2272
0.7360	0.3753	63.7330
0.7370	0.4007	63.1440
0.7380	0.4261	62.4655
0.7390	0.4515	61.7049
0.7400	0.4769	60.8706
0.7410	0.5023	59.9715
0.7420	0.5277	59.0160
0.7430	0.5531	58.0122
0.7440	0.5785	56.9671
0.7450	0.6039	55.8875
0.7460	0.6293	54.7795
0.7470	0.6547	53.6489
0.7480	0.6801	52.5014
0.7490	0.7055	51.3422
0.7500	0.7309	50.1762
0.7510	0.7563	49.0078
0.7520	0.7817	47.8411
0.7530	0.8071	46.6798
0.7540	0.8325	45.5274
0.7550	0.8579	44.3876
0.7560	0.8833	43.2631
0.7570	0.9087	42.1563
0.7580	0.9341	41.0692
0.7590	0.9595	40.0033
0.7600	0.9849	38.9603
0.7610	1.0104	37.9415
0.7620	1.0358	36.9480
0.7630	1.0612	35.9807
0.7640	1.0866	35.0406
0.7650	1.1120	34.1283
0.7660	1.1374	33.2445
0.7670	1.1628	32.3898
0.7680	1.1882	31.5647
0.7690	1.2136	30.7695
0.7700	1.2391	30.0043
0.7710	1.2645	29.2694
0.7720	1.2899	28.5651
0.7730	1.3153	27.8914
0.7740	1.3407	27.2482
0.7750	1.3661	26.6352
0.7760	1.3915	26.0519
0.7770	1.4169	25.4977
0.7780	1.4423	24.9721
0.7790	1.4677	24.4749
0.7800	1.4931	24.0052
0.7810	1.5185	23.5623
0.7820	1.5440	23.1456
0.7830	1.5694	22.7542
0.7840	1.5948	22.3874
0.7850	1.6202	22.0440
0.7860	1.6456	21.7234
0.7870	1.6710	21.4247
0.7880	1.6964	21.1471
0.7890	1.7218	20.8897
0.7900	1.7472	20.6520
0.7910	1.7726	20.4331
0.7920	1.7980	20.2321
0.7930	1.8234	20.0480
0.7940	1.8488	19.8799
0.7950	1.8743	19.7269
0.7960	1.8997	19.5881
0.7970	1.9251	19.4629
0.7980	1.9505	19.3507
0.7990	1.9759	19.2508
0.8000	2.0013	19.1624
0.8010	2.0267	19.0845
0.8020	2.0521	19.0166
0.8030	2.0775	18.9578
0.8040	2.1029	18.9075
0.8050	2.1283	18.8651
0.8060	2.1537	18.8301
0.8070	2.1791	18.8018
0.8080	2.2045	18.7798
0.8090	2.2299	18.7634
0.8100	2.2553	18.7520
0.8110	2.2807	18.7448
0.8120	2.3061	18.7412
0.8130	2.3315	18.7404
0.8140	2.3569	18.7419
0.8150	2.3823	18.7451
0.8160	2.4077	18.7496
0.8170	2.4331	18.7550
0.8180	2.4585	18.7608
0.8190	2.4839	18.7668
0.8200	2.5093	18.7725
0.8210	2.5347	18.7780
0.8220	2.5601	18.7831
0.8230	2.5855	18.7875
0.8240	2.6109	18.7914
0.8250	2.6363	18.7945
0.8260	2.6617	18.7968
0.8270	2.6871	18.7982
0.8280	2.7125	18.7985
0.8290	2.7379	18.7975
0.8300	2.7633	18.7951
0.8310	2.7887	18.7911
0.8320	2.8141	18.7857
0.8330	2.8395	18.7789
0.8340	2.8649	18.7708
0.8350	2.8903	18.7614
0.8360	2.9157	18.7508
0.8370	2.9411	18.7386
0.8380	2.9665	18.7248
0.8390	2.9919	18.7091
0.8400	3.0173	18.6913
0.8410	3.0427	18.6714
0.8420	3.0681	18.6495
0.8430	3.0935	18.6256
0.8440	3.1189	18.6001
0.8450	3.1443	18.5729
0.8460	3.1697	18.5441
0.8470	3.1951	18.5138
0.8480	3.2205	18.4819
0.8490	3.2459	18.4483
0.8500	3.2713	18.4121
0.8510	3.2967	18.3724
0.8520	3.3221	18.3286
0.8530	3.3475	18.2803
0.8540	3.3729	18.2276
0.8550	3.3983	18.1711
0.8560	3.4236	18.1112
0.8570	3.4490	18.0482
0.8580	3.4744	17.9826
0.8590	3.4998	17.9148
0.8600	3.5252	17.8451
0.8610	3.5506	17.7738
0.8620	3.5760	17.7014
0.8630	3.6014	17.6283
0.8640	3.6268	17.5547
0.8650	3.6522	17.4809
0.8660	3.6776	17.4067
0.8670	3.7030	17.3324
0.8680	3.7284	17.2578
0.8690	3.7538	17.1830
0.8700	3.7792	17.1081
0.8710	3.8046	17.0331
0.8720	3.8300	16.9583
0.8730	3.8554	16.8835
0.8740	3.8808	16.8087
0.8750	3.9062	16.7340
0.8760	3.9316	16.6592
0.8770	3.9570	16.5846
0.8780	3.9824	16.5103
0.8790	4.0078	16.4365
0.8800	4.0332	16.3634
0.8810	4.0586	16.2907
0.8820	4.0840	16.2184
0.8830	4.1094	16.1466
0.8840	4.1348	16.0752
0.8850	4.1602	16.0042
0.8860	4.1856	15.9341
0.8870	4.2110	15.8647
0.8880	4.2364	15.7961
0.8890	4.2618	15.7284
0.8900	4.2872	15.6617
0.8910	4.3126	15.5960
0.8920	4.3380	15.5314
0.8930	4.3634	15.4678
0.8940	4.3888	15.4051
0.8950	4.4142	15.3434
0.8960	4.4395	15.2826
0.8970	4.4649	15.2227
0.8980	4.4903	15.1636
0.8990	4.5157	15.1056
0.9000	4.5411	15.0487
0.9010	4.5665	14.9926
0.9020	4.5919	14.9371
0.9030	4.6173	14.8812
0.9040	4.6427	14.8245
0.9050	4.6680	14.7666
0.9060	4.6934	14.7075
0.9070	4.7186	14.6475
0.9080	4.7438	14.5870
0.9090	4.7690	14.5262
0.9100	4.7940	14.4650
0.9110	4.8189	14.4034
0.9120	4.8437	14.3412
0.9130	4.8683	14.2782
0.9140	4.8928	14.2147
0.9150	4.9171	14.1508
0.9160	4.9411	14.0867
0.9170	4.9649	14.0222
0.9180	4.9884	13.9571
0.9190	5.0117	13.8914
0.9200	5.0346	13.8249
