# Supplementary material for: Integrated Puncture Score: force–displacement weighted rind penetration tests improve stalk lodging resistance estimations in maize
Source: Plant Methods. 2020 Aug 15;16:113. doi: 10.1186/s13007-020-00654-w (PMC7429900; doi:10.1186/s13007-020-00654-w)
Supplement: Supplementary file 4 — Additional file 4. Example force-displacement data from a puncture test. [file 13007_2020_654_MOESM4_ESM.csv]

Time	Displacement	Force
(s)	(mm)	(N)
0.0000	-16.4858	0.0038
0.0010	-16.4858	0.0034
0.0020	-16.4858	0.0030
0.0030	-16.4858	0.0027
0.0040	-16.4858	0.0030
0.0050	-16.4858	0.0039
0.0060	-16.4858	0.0057
0.0070	-16.4858	0.0084
0.0080	-16.4857	0.0125
0.0090	-16.4856	0.0183
0.0100	-16.4855	0.0258
0.0110	-16.4853	0.0348
0.0120	-16.4850	0.0446
0.0130	-16.4846	0.0548
0.0140	-16.4841	0.0651
0.0150	-16.4835	0.0754
0.0160	-16.4828	0.0858
0.0170	-16.4818	0.0965
0.0180	-16.4808	0.1074
0.0190	-16.4795	0.1185
0.0200	-16.4780	0.1298
0.0210	-16.4763	0.1413
0.0220	-16.4743	0.1530
0.0230	-16.4720	0.1649
0.0240	-16.4695	0.1769
0.0250	-16.4667	0.1888
0.0260	-16.4635	0.2005
0.0270	-16.4600	0.2119
0.0280	-16.4561	0.2231
0.0290	-16.4519	0.2340
0.0300	-16.4473	0.2446
0.0310	-16.4422	0.2549
0.0320	-16.4368	0.2652
0.0330	-16.4309	0.2766
0.0340	-16.4245	0.2918
0.0350	-16.4177	0.3146
0.0360	-16.4104	0.3504
0.0370	-16.4026	0.4049
0.0380	-16.3943	0.4845
0.0390	-16.3855	0.5950
0.0400	-16.3762	0.7419
0.0410	-16.3663	0.9298
0.0420	-16.3559	1.1628
0.0430	-16.3449	1.4442
0.0440	-16.3333	1.7765
0.0450	-16.3212	2.1607
0.0460	-16.3085	2.5968
0.0470	-16.2952	3.0838
0.0480	-16.2812	3.6205
0.0490	-16.2667	4.2055
0.0500	-16.2516	4.8376
0.0510	-16.2359	5.5153
0.0520	-16.2196	6.2372
0.0530	-16.2027	7.0010
0.0540	-16.1852	7.8026
0.0550	-16.1672	8.6378
0.0560	-16.1486	9.5025
0.0570	-16.1296	10.3935
0.0580	-16.1100	11.3080
0.0590	-16.0900	12.2434
0.0600	-16.0696	13.1973
0.0610	-16.0487	14.1673
0.0620	-16.0275	15.1514
0.0630	-16.0058	16.1475
0.0640	-15.9839	17.1538
0.0650	-15.9616	18.1683
0.0660	-15.9391	19.1889
0.0670	-15.9163	20.2138
0.0680	-15.8932	21.2412
0.0690	-15.8699	22.2699
0.0700	-15.8464	23.2988
0.0710	-15.8228	24.3267
0.0720	-15.7989	25.3526
0.0730	-15.7749	26.3750
0.0740	-15.7507	27.3928
0.0750	-15.7264	28.4047
0.0760	-15.7020	29.4103
0.0770	-15.6775	30.4090
0.0780	-15.6529	31.4006
0.0790	-15.6281	32.3846
0.0800	-15.6033	33.3603
0.0810	-15.5784	34.3276
0.0820	-15.5535	35.2859
0.0830	-15.5284	36.2350
0.0840	-15.5033	37.1747
0.0850	-15.4782	38.1047
0.0860	-15.4530	39.0247
0.0870	-15.4277	39.9343
0.0880	-15.4024	40.8332
0.0890	-15.3770	41.7214
0.0900	-15.3516	42.5986
0.0910	-15.3261	43.4645
0.0920	-15.3006	44.3187
0.0930	-15.2751	45.1608
0.0940	-15.2495	45.9902
0.0950	-15.2239	46.8065
0.0960	-15.1983	47.6090
0.0970	-15.1726	48.3974
0.0980	-15.1469	49.1713
0.0990	-15.1212	49.9304
0.1000	-15.0954	50.6749
0.1010	-15.0696	51.4047
0.1020	-15.0438	52.1199
0.1030	-15.0180	52.8205
0.1040	-14.9922	53.5066
0.1050	-14.9663	54.1781
0.1060	-14.9404	54.8349
0.1070	-14.9145	55.4768
0.1080	-14.8886	56.1037
0.1090	-14.8627	56.7156
0.1100	-14.8368	57.3127
0.1110	-14.8109	57.8954
0.1120	-14.7849	58.4638
0.1130	-14.7590	59.0176
0.1140	-14.7331	59.5561
0.1150	-14.7071	60.0782
0.1160	-14.6812	60.5826
0.1170	-14.6553	61.0681
0.1180	-14.6294	61.5336
0.1190	-14.6034	61.9782
0.1200	-14.5775	62.4010
0.1210	-14.5516	62.8013
0.1220	-14.5257	63.1782
0.1230	-14.4998	63.5312
0.1240	-14.4740	63.8597
0.1250	-14.4481	64.1630
0.1260	-14.4223	64.4398
0.1270	-14.3964	64.6888
0.1280	-14.3706	64.9088
0.1290	-14.3448	65.0994
0.1300	-14.3190	65.2612
0.1310	-14.2932	65.3952
0.1320	-14.2674	65.5026
0.1330	-14.2416	65.5824
0.1340	-14.2159	65.6304
0.1350	-14.1901	65.6427
0.1360	-14.1644	65.6180
0.1370	-14.1387	65.5578
0.1380	-14.1130	65.4647
0.1390	-14.0873	65.3420
0.1400	-14.0616	65.1936
0.1410	-14.0360	65.0234
0.1420	-14.0103	64.8341
0.1430	-13.9847	64.6264
0.1440	-13.9590	64.4000
0.1450	-13.9334	64.1557
0.1460	-13.9078	63.8951
0.1470	-13.8822	63.6202
0.1480	-13.8566	63.3330
0.1490	-13.8310	63.0359
0.1500	-13.8055	62.7314
0.1510	-13.7799	62.4224
0.1520	-13.7544	62.1108
0.1530	-13.7288	61.7974
0.1540	-13.7033	61.4823
0.1550	-13.6778	61.1655
0.1560	-13.6523	60.8483
0.1570	-13.6267	60.5326
0.1580	-13.6012	60.2208
0.1590	-13.5757	59.9151
0.1600	-13.5502	59.6175
0.1610	-13.5248	59.3293
0.1620	-13.4993	59.0512
0.1630	-13.4738	58.7837
0.1640	-13.4483	58.5264
0.1650	-13.4228	58.2793
0.1660	-13.3974	58.0423
0.1670	-13.3719	57.8157
0.1680	-13.3464	57.5998
0.1690	-13.3210	57.3899
0.1700	-13.2955	57.1685
0.1710	-13.2701	56.9119
0.1720	-13.2446	56.6033
0.1730	-13.2192	56.2364
0.1740	-13.1937	55.8127
0.1750	-13.1683	55.3373
0.1760	-13.1428	54.8155
0.1770	-13.1174	54.2501
0.1780	-13.0919	53.6390
0.1790	-13.0665	52.9773
0.1800	-13.0410	52.2630
0.1810	-13.0156	51.4984
0.1820	-12.9902	50.6899
0.1830	-12.9647	49.8447
0.1840	-12.9393	48.9702
0.1850	-12.9138	48.0733
0.1860	-12.8884	47.1604
0.1870	-12.8630	46.2365
0.1880	-12.8376	45.3063
0.1890	-12.8121	44.3740
0.1900	-12.7867	43.4440
0.1910	-12.7613	42.5201
0.1920	-12.7358	41.6058
0.1930	-12.7104	40.7038
0.1940	-12.6850	39.8161
0.1950	-12.6595	38.9450
0.1960	-12.6341	38.0918
0.1970	-12.6087	37.2566
0.1980	-12.5832	36.4387
0.1990	-12.5578	35.6385
0.2000	-12.5324	34.8567
0.2010	-12.5069	34.0946
0.2020	-12.4815	33.3536
0.2030	-12.4560	32.6349
0.2040	-12.4306	31.9396
0.2050	-12.4052	31.2685
0.2060	-12.3797	30.6218
0.2070	-12.3543	29.9994
0.2080	-12.3289	29.4013
0.2090	-12.3034	28.8274
0.2100	-12.2780	28.2774
0.2110	-12.2526	27.7512
0.2120	-12.2272	27.2488
0.2130	-12.2017	26.7697
0.2140	-12.1763	26.3138
0.2150	-12.1509	25.8807
0.2160	-12.1255	25.4697
0.2170	-12.1000	25.0803
0.2180	-12.0746	24.7118
0.2190	-12.0492	24.3640
0.2200	-12.0238	24.0362
0.2210	-11.9984	23.7277
0.2220	-11.9729	23.4378
0.2230	-11.9475	23.1655
0.2240	-11.9221	22.9100
0.2250	-11.8967	22.6704
0.2260	-11.8713	22.4463
0.2270	-11.8459	22.2367
0.2280	-11.8204	22.0410
0.2290	-11.7950	21.8582
0.2300	-11.7696	21.6874
0.2310	-11.7442	21.5282
0.2320	-11.7188	21.3799
0.2330	-11.6934	21.2421
0.2340	-11.6680	21.1137
0.2350	-11.6425	20.9928
0.2360	-11.6171	20.8780
0.2370	-11.5917	20.7680
0.2380	-11.5663	20.6618
0.2390	-11.5409	20.5589
0.2400	-11.5155	20.4589
0.2410	-11.4901	20.3617
0.2420	-11.4647	20.2674
0.2430	-11.4393	20.1759
0.2440	-11.4139	20.0869
0.2450	-11.3885	20.0001
0.2460	-11.3631	19.9150
0.2470	-11.3376	19.8317
0.2480	-11.3122	19.7503
0.2490	-11.2868	19.6709
0.2500	-11.2614	19.5934
0.2510	-11.2360	19.5176
0.2520	-11.2106	19.4435
0.2530	-11.1852	19.3711
0.2540	-11.1598	19.3008
0.2550	-11.1344	19.2327
0.2560	-11.1090	19.1673
0.2570	-11.0836	19.1044
0.2580	-11.0582	19.0438
0.2590	-11.0327	18.9854
0.2600	-11.0073	18.9290
0.2610	-10.9819	18.8744
0.2620	-10.9565	18.8214
0.2630	-10.9311	18.7700
0.2640	-10.9057	18.7203
0.2650	-10.8803	18.6726
0.2660	-10.8549	18.6271
0.2670	-10.8295	18.5840
0.2680	-10.8041	18.5431
0.2690	-10.7787	18.5042
0.2700	-10.7532	18.4666
0.2710	-10.7278	18.4300
0.2720	-10.7024	18.3941
0.2730	-10.6770	18.3588
0.2740	-10.6516	18.3240
0.2750	-10.6262	18.2894
0.2760	-10.6008	18.2544
0.2770	-10.5754	18.2180
0.2780	-10.5500	18.1794
0.2790	-10.5246	18.1381
0.2800	-10.4992	18.0941
0.2810	-10.4738	18.0476
0.2820	-10.4484	17.9988
0.2830	-10.4230	17.9478
0.2840	-10.3976	17.8949
0.2850	-10.3722	17.8400
0.2860	-10.3468	17.7833
0.2870	-10.3214	17.7249
0.2880	-10.2960	17.6649
0.2890	-10.2705	17.6038
0.2900	-10.2451	17.5417
0.2910	-10.2197	17.4795
0.2920	-10.1943	17.4179
0.2930	-10.1689	17.3570
0.2940	-10.1435	17.2969
0.2950	-10.1181	17.2375
0.2960	-10.0927	17.1788
0.2970	-10.0673	17.1209
0.2980	-10.0419	17.0636
0.2990	-10.0165	17.0066
0.3000	-9.9911	16.9496
0.3010	-9.9657	16.8923
0.3020	-9.9403	16.8348
0.3030	-9.9149	16.7773
0.3040	-9.8895	16.7198
0.3050	-9.8641	16.6625
0.3060	-9.8388	16.6053
0.3070	-9.8134	16.5473
0.3080	-9.7880	16.4865
0.3090	-9.7626	16.4196
0.3100	-9.7372	16.3437
0.3110	-9.7118	16.2576
0.3120	-9.6864	16.1617
0.3130	-9.6610	16.0568
0.3140	-9.6356	15.9439
0.3150	-9.6102	15.8234
0.3160	-9.5848	15.6956
0.3170	-9.5594	15.5609
0.3180	-9.5340	15.4199
0.3190	-9.5086	15.2734
0.3200	-9.4832	15.1220
0.3210	-9.4578	14.9661
0.3220	-9.4324	14.8062
0.3230	-9.4070	14.6429
0.3240	-9.3816	14.4769
0.3250	-9.3562	14.3091
0.3260	-9.3308	14.1401
0.3270	-9.3054	13.9708
0.3280	-9.2800	13.8018
0.3290	-9.2546	13.6337
0.3300	-9.2292	13.4671
0.3310	-9.2038	13.3025
0.3320	-9.1784	13.1404
0.3330	-9.1530	12.9812
0.3340	-9.1276	12.8248
0.3350	-9.1022	12.6714
0.3360	-9.0768	12.5213
0.3370	-9.0514	12.3751
0.3380	-9.0260	12.2333
0.3390	-9.0006	12.0962
0.3400	-8.9752	11.9641
0.3410	-8.9498	11.8372
0.3420	-8.9244	11.7153
0.3430	-8.8990	11.5983
0.3440	-8.8736	11.4862
0.3450	-8.8482	11.3791
0.3460	-8.8228	11.2767
0.3470	-8.7974	11.1790
0.3480	-8.7720	11.0860
0.3490	-8.7466	10.9977
0.3500	-8.7212	10.9140
0.3510	-8.6958	10.8349
0.3520	-8.6703	10.7600
0.3530	-8.6449	10.6891
0.3540	-8.6195	10.6219
0.3550	-8.5941	10.5580
0.3560	-8.5687	10.4972
0.3570	-8.5433	10.4395
0.3580	-8.5179	10.3845
0.3590	-8.4925	10.3325
0.3600	-8.4671	10.2832
0.3610	-8.4417	10.2369
0.3620	-8.4163	10.1932
0.3630	-8.3909	10.1520
0.3640	-8.3655	10.1129
0.3650	-8.3401	10.0759
0.3660	-8.3146	10.0408
0.3670	-8.2892	10.0078
0.3680	-8.2638	9.9767
0.3690	-8.2384	9.9476
0.3700	-8.2130	9.9205
0.3710	-8.1876	9.8955
0.3720	-8.1622	9.8725
0.3730	-8.1368	9.8514
0.3740	-8.1114	9.8317
0.3750	-8.0860	9.8134
0.3760	-8.0606	9.7964
0.3770	-8.0352	9.7808
0.3780	-8.0098	9.7666
0.3790	-7.9844	9.7537
0.3800	-7.9589	9.7421
0.3810	-7.9335	9.7319
0.3820	-7.9081	9.7230
0.3830	-7.8827	9.7155
0.3840	-7.8573	9.7091
0.3850	-7.8319	9.7037
0.3860	-7.8065	9.6992
0.3870	-7.7811	9.6957
0.3880	-7.7557	9.6930
0.3890	-7.7303	9.6913
0.3900	-7.7049	9.6907
0.3910	-7.6795	9.6911
0.3920	-7.6541	9.6922
0.3930	-7.6287	9.6937
0.3940	-7.6033	9.6947
0.3950	-7.5779	9.6952
0.3960	-7.5525	9.6951
0.3970	-7.5271	9.6945
0.3980	-7.5017	9.6935
0.3990	-7.4763	9.6921
0.4000	-7.4509	9.6905
0.4010	-7.4255	9.6888
0.4020	-7.4001	9.6870
0.4030	-7.3747	9.6851
0.4040	-7.3493	9.6832
0.4050	-7.3239	9.6815
0.4060	-7.2985	9.6800
0.4070	-7.2731	9.6787
0.4080	-7.2477	9.6774
0.4090	-7.2223	9.6759
0.4100	-7.1969	9.6743
0.4110	-7.1715	9.6728
0.4120	-7.1461	9.6716
0.4130	-7.1207	9.6708
0.4140	-7.0953	9.6707
0.4150	-7.0699	9.6710
0.4160	-7.0445	9.6715
0.4170	-7.0191	9.6724
0.4180	-6.9937	9.6734
0.4190	-6.9683	9.6746
0.4200	-6.9429	9.6758
0.4210	-6.9175	9.6769
0.4220	-6.8921	9.6779
0.4230	-6.8667	9.6787
0.4240	-6.8413	9.6795
0.4250	-6.8159	9.6804
0.4260	-6.7905	9.6817
0.4270	-6.7651	9.6837
0.4280	-6.7397	9.6864
0.4290	-6.7143	9.6898
0.4300	-6.6889	9.6942
0.4310	-6.6635	9.6995
0.4320	-6.6381	9.7058
0.4330	-6.6127	9.7127
0.4340	-6.5873	9.7203
0.4350	-6.5619	9.7285
0.4360	-6.5365	9.7372
0.4370	-6.5111	9.7466
0.4380	-6.4857	9.7568
0.4390	-6.4603	9.7677
0.4400	-6.4349	9.7794
0.4410	-6.4095	9.7919
0.4420	-6.3841	9.8056
0.4430	-6.3587	9.8204
0.4440	-6.3333	9.8364
0.4450	-6.3079	9.8531
0.4460	-6.2825	9.8703
0.4470	-6.2571	9.8880
0.4480	-6.2317	9.9062
0.4490	-6.2063	9.9249
0.4500	-6.1809	9.9439
0.4510	-6.1555	9.9625
0.4520	-6.1301	9.9803
0.4530	-6.1047	9.9972
0.4540	-6.0793	10.0132
0.4550	-6.0539	10.0286
0.4560	-6.0285	10.0433
0.4570	-6.0031	10.0576
0.4580	-5.9777	10.0714
0.4590	-5.9523	10.0852
0.4600	-5.9269	10.0992
0.4610	-5.9015	10.1134
0.4620	-5.8761	10.1276
0.4630	-5.8507	10.1416
0.4640	-5.8253	10.1553
0.4650	-5.7999	10.1688
0.4660	-5.7745	10.1819
0.4670	-5.7491	10.1950
0.4680	-5.7237	10.2081
0.4690	-5.6983	10.2214
0.4700	-5.6729	10.2349
0.4710	-5.6475	10.2484
0.4720	-5.6221	10.2620
0.4730	-5.5967	10.2754
0.4740	-5.5713	10.2887
0.4750	-5.5459	10.3015
0.4760	-5.5205	10.3136
0.4770	-5.4951	10.3250
0.4780	-5.4697	10.3355
0.4790	-5.4443	10.3448
0.4800	-5.4189	10.3528
0.4810	-5.3935	10.3595
0.4820	-5.3681	10.3649
0.4830	-5.3427	10.3691
0.4840	-5.3173	10.3723
0.4850	-5.2919	10.3748
0.4860	-5.2665	10.3765
0.4870	-5.2411	10.3776
0.4880	-5.2157	10.3779
0.4890	-5.1903	10.3774
0.4900	-5.1649	10.3763
0.4910	-5.1395	10.3750
0.4920	-5.1141	10.3739
0.4930	-5.0887	10.3731
0.4940	-5.0633	10.3728
0.4950	-5.0379	10.3730
0.4960	-5.0125	10.3736
0.4970	-4.9871	10.3745
0.4980	-4.9617	10.3759
0.4990	-4.9363	10.3779
0.5000	-4.9109	10.3807
0.5010	-4.8855	10.3845
0.5020	-4.8601	10.3891
0.5030	-4.8347	10.3947
0.5040	-4.8093	10.4013
0.5050	-4.7839	10.4091
0.5060	-4.7585	10.4184
0.5070	-4.7331	10.4292
0.5080	-4.7077	10.4414
0.5090	-4.6823	10.4552
0.5100	-4.6570	10.4705
0.5110	-4.6316	10.4872
0.5120	-4.6062	10.5056
0.5130	-4.5808	10.5257
0.5140	-4.5554	10.5476
0.5150	-4.5300	10.5714
0.5160	-4.5046	10.5968
0.5170	-4.4792	10.6236
0.5180	-4.4538	10.6516
0.5190	-4.4284	10.6807
0.5200	-4.4030	10.7109
0.5210	-4.3776	10.7420
0.5220	-4.3522	10.7742
0.5230	-4.3268	10.8072
0.5240	-4.3014	10.8409
0.5250	-4.2760	10.8752
0.5260	-4.2506	10.9098
0.5270	-4.2252	10.9448
0.5280	-4.1998	10.9799
0.5290	-4.1744	11.0147
0.5300	-4.1490	11.0487
0.5310	-4.1236	11.0814
0.5320	-4.0982	11.1129
0.5330	-4.0728	11.1435
0.5340	-4.0474	11.1731
0.5350	-4.0220	11.2017
0.5360	-3.9966	11.2294
0.5370	-3.9712	11.2560
0.5380	-3.9458	11.2815
0.5390	-3.9204	11.3053
0.5400	-3.8950	11.3273
0.5410	-3.8696	11.3470
0.5420	-3.8442	11.3644
0.5430	-3.8189	11.3798
0.5440	-3.7935	11.3934
0.5450	-3.7681	11.4056
0.5460	-3.7427	11.4166
0.5470	-3.7173	11.4268
0.5480	-3.6919	11.4365
0.5490	-3.6665	11.4460
0.5500	-3.6411	11.4555
0.5510	-3.6157	11.4649
0.5520	-3.5903	11.4742
0.5530	-3.5649	11.4833
0.5540	-3.5395	11.4921
0.5550	-3.5141	11.5008
0.5560	-3.4887	11.5092
0.5570	-3.4633	11.5173
0.5580	-3.4379	11.5251
0.5590	-3.4125	11.5328
0.5600	-3.3871	11.5404
0.5610	-3.3617	11.5481
0.5620	-3.3363	11.5561
0.5630	-3.3109	11.5648
0.5640	-3.2855	11.5743
0.5650	-3.2601	11.5849
0.5660	-3.2347	11.5970
0.5670	-3.2093	11.6108
0.5680	-3.1839	11.6267
0.5690	-3.1585	11.6449
0.5700	-3.1331	11.6655
0.5710	-3.1077	11.6884
0.5720	-3.0823	11.7136
0.5730	-3.0569	11.7408
0.5740	-3.0315	11.7700
0.5750	-3.0061	11.8009
0.5760	-2.9807	11.8335
0.5770	-2.9553	11.8675
0.5780	-2.9299	11.9027
0.5790	-2.9045	11.9389
0.5800	-2.8791	11.9759
0.5810	-2.8537	12.0136
0.5820	-2.8283	12.0522
0.5830	-2.8028	12.0915
0.5840	-2.7774	12.1315
0.5850	-2.7520	12.1722
0.5860	-2.7266	12.2136
0.5870	-2.7012	12.2551
0.5880	-2.6758	12.2958
0.5890	-2.6504	12.3351
0.5900	-2.6250	12.3727
0.5910	-2.5996	12.4087
0.5920	-2.5742	12.4434
0.5930	-2.5488	12.4773
0.5940	-2.5234	12.5105
0.5950	-2.4980	12.5435
0.5960	-2.4726	12.5761
0.5970	-2.4472	12.6084
0.5980	-2.4218	12.6406
0.5990	-2.3964	12.6727
0.6000	-2.3710	12.7050
0.6010	-2.3456	12.7370
0.6020	-2.3202	12.7682
0.6030	-2.2948	12.7981
0.6040	-2.2694	12.8265
0.6050	-2.2440	12.8538
0.6060	-2.2186	12.8807
0.6070	-2.1932	12.9080
0.6080	-2.1678	12.9365
0.6090	-2.1424	12.9669
0.6100	-2.1170	12.9998
0.6110	-2.0916	13.0354
0.6120	-2.0662	13.0742
0.6130	-2.0407	13.1167
0.6140	-2.0153	13.1632
0.6150	-1.9899	13.2143
0.6160	-1.9645	13.2698
0.6170	-1.9391	13.3295
0.6180	-1.9137	13.3933
0.6190	-1.8883	13.4618
0.6200	-1.8629	13.5356
0.6210	-1.8375	13.6156
0.6220	-1.8121	13.7029
0.6230	-1.7867	13.7985
0.6240	-1.7613	13.9033
0.6250	-1.7359	14.0182
0.6260	-1.7105	14.1440
0.6270	-1.6851	14.2819
0.6280	-1.6597	14.4326
0.6290	-1.6343	14.5970
0.6300	-1.6090	14.7757
0.6310	-1.5836	14.9694
0.6320	-1.5582	15.1792
0.6330	-1.5328	15.4067
0.6340	-1.5074	15.6535
0.6350	-1.4820	15.9214
0.6360	-1.4566	16.2128
0.6370	-1.4312	16.5295
0.6380	-1.4058	16.8735
0.6390	-1.3804	17.2459
0.6400	-1.3550	17.6475
0.6410	-1.3296	18.0787
0.6420	-1.3042	18.5385
0.6430	-1.2788	19.0255
0.6440	-1.2534	19.5384
0.6450	-1.2280	20.0763
0.6460	-1.2026	20.6392
0.6470	-1.1772	21.2278
0.6480	-1.1518	21.8430
0.6490	-1.1264	22.4859
0.6500	-1.1010	23.1578
0.6510	-1.0756	23.8594
0.6520	-1.0502	24.5914
0.6530	-1.0248	25.3540
0.6540	-0.9994	26.1474
0.6550	-0.9740	26.9719
0.6560	-0.9486	27.8277
0.6570	-0.9232	28.7146
0.6580	-0.8978	29.6316
0.6590	-0.8724	30.5765
0.6600	-0.8470	31.5465
0.6610	-0.8216	32.5386
0.6620	-0.7962	33.5494
0.6630	-0.7708	34.5767
0.6640	-0.7454	35.6183
0.6650	-0.7200	36.6727
0.6660	-0.6946	37.7376
0.6670	-0.6692	38.8115
0.6680	-0.6438	39.8935
0.6690	-0.6184	40.9839
0.6700	-0.5930	42.0826
0.6710	-0.5676	43.1886
0.6720	-0.5422	44.3002
0.6730	-0.5168	45.4162
0.6740	-0.4914	46.5370
0.6750	-0.4660	47.6634
0.6760	-0.4406	48.7963
0.6770	-0.4152	49.9357
0.6780	-0.3898	51.0790
0.6790	-0.3644	52.2193
0.6800	-0.3390	53.3492
0.6810	-0.3136	54.4639
0.6820	-0.2883	55.5617
0.6830	-0.2629	56.6430
0.6840	-0.2375	57.7087
0.6850	-0.2121	58.7587
0.6860	-0.1867	59.7910
0.6870	-0.1613	60.8018
0.6880	-0.1359	61.7866
0.6890	-0.1105	62.7409
0.6900	-0.0851	63.6602
0.6910	-0.0597	64.5374
0.6920	-0.0343	65.3606
0.6930	-0.0089	66.1184
0.6940	0.0164	66.8037
0.6950	0.0418	67.4105
0.6960	0.0672	67.9325
0.6970	0.0926	68.3611
0.6980	0.1180	68.6845
0.6990	0.1434	68.8921
0.7000	0.1688	68.9799
0.7010	0.1942	68.9505
0.7020	0.2196	68.8094
0.7030	0.2450	68.5627
0.7040	0.2704	68.2178
0.7050	0.2958	67.7812
0.7060	0.3212	67.2572
0.7070	0.3466	66.6489
0.7080	0.3720	65.9614
0.7090	0.3974	65.2011
0.7100	0.4228	64.3752
0.7110	0.4482	63.4910
0.7120	0.4736	62.5548
0.7130	0.4990	61.5723
0.7140	0.5244	60.5484
0.7150	0.5498	59.4874
0.7160	0.5752	58.3928
0.7170	0.6006	57.2672
0.7180	0.6260	56.1128
0.7190	0.6514	54.9325
0.7200	0.6769	53.7301
0.7210	0.7023	52.5106
0.7220	0.7277	51.2796
0.7230	0.7531	50.0425
0.7240	0.7785	48.8046
0.7250	0.8039	47.5705
0.7260	0.8293	46.3447
0.7270	0.8547	45.1308
0.7280	0.8801	43.9324
0.7290	0.9055	42.7523
0.7300	0.9309	41.5931
0.7310	0.9563	40.4574
0.7320	0.9817	39.3476
0.7330	1.0072	38.2657
0.7340	1.0326	37.2137
0.7350	1.0580	36.1927
0.7360	1.0834	35.2040
0.7370	1.1088	34.2485
0.7380	1.1342	33.3268
0.7390	1.1596	32.4398
0.7400	1.1850	31.5880
0.7410	1.2104	30.7714
0.7420	1.2358	29.9902
0.7430	1.2612	29.2442
0.7440	1.2866	28.5333
0.7450	1.3120	27.8575
0.7460	1.3374	27.2164
0.7470	1.3628	26.6096
0.7480	1.3882	26.0363
0.7490	1.4136	25.4957
0.7500	1.4390	24.9869
0.7510	1.4644	24.5088
0.7520	1.4898	24.0606
0.7530	1.5152	23.6412
0.7540	1.5406	23.2496
0.7550	1.5660	22.8849
0.7560	1.5914	22.5462
0.7570	1.6169	22.2324
0.7580	1.6423	21.9426
0.7590	1.6677	21.6756
0.7600	1.6931	21.4305
0.7610	1.7185	21.2061
0.7620	1.7439	21.0015
0.7630	1.7693	20.8159
0.7640	1.7947	20.6480
0.7650	1.8201	20.4971
0.7660	1.8455	20.3620
0.7670	1.8709	20.2417
0.7680	1.8963	20.1354
0.7690	1.9217	20.0426
0.7700	1.9471	19.9625
0.7710	1.9725	19.8941
0.7720	1.9979	19.8367
0.7730	2.0233	19.7892
0.7740	2.0487	19.7509
0.7750	2.0741	19.7209
0.7760	2.0995	19.6986
0.7770	2.1249	19.6833
0.7780	2.1503	19.6743
0.7790	2.1757	19.6710
0.7800	2.2011	19.6727
0.7810	2.2265	19.6789
0.7820	2.2519	19.6890
0.7830	2.2773	19.7022
0.7840	2.3027	19.7181
0.7850	2.3281	19.7361
0.7860	2.3535	19.7556
0.7870	2.3789	19.7762
0.7880	2.4043	19.7973
0.7890	2.4297	19.8188
0.7900	2.4551	19.8403
0.7910	2.4805	19.8615
0.7920	2.5059	19.8822
0.7930	2.5313	19.9021
0.7940	2.5567	19.9212
0.7950	2.5821	19.9391
0.7960	2.6075	19.9559
0.7970	2.6330	19.9715
0.7980	2.6584	19.9859
0.7990	2.6838	19.9991
0.8000	2.7092	20.0107
0.8010	2.7346	20.0208
0.8020	2.7600	20.0292
0.8030	2.7854	20.0359
0.8040	2.8108	20.0410
0.8050	2.8362	20.0445
0.8060	2.8616	20.0466
0.8070	2.8870	20.0474
0.8080	2.9124	20.0470
0.8090	2.9378	20.0452
0.8100	2.9632	20.0418
0.8110	2.9886	20.0367
0.8120	3.0140	20.0298
0.8130	3.0394	20.0213
0.8140	3.0648	20.0113
0.8150	3.0902	19.9998
0.8160	3.1156	19.9870
0.8170	3.1410	19.9730
0.8180	3.1664	19.9579
0.8190	3.1918	19.9417
0.8200	3.2172	19.9245
0.8210	3.2426	19.9063
0.8220	3.2680	19.8871
0.8230	3.2934	19.8668
0.8240	3.3188	19.8455
0.8250	3.3442	19.8231
0.8260	3.3696	19.7995
0.8270	3.3950	19.7749
0.8280	3.4204	19.7493
0.8290	3.4457	19.7228
0.8300	3.4711	19.6954
0.8310	3.4965	19.6669
0.8320	3.5219	19.6375
0.8330	3.5473	19.6071
0.8340	3.5727	19.5760
0.8350	3.5981	19.5441
0.8360	3.6235	19.5115
0.8370	3.6489	19.4783
0.8380	3.6743	19.4443
0.8390	3.6997	19.4097
0.8400	3.7251	19.3743
0.8410	3.7505	19.3383
0.8420	3.7759	19.3015
0.8430	3.8013	19.2640
0.8440	3.8267	19.2260
0.8450	3.8521	19.1876
0.8460	3.8775	19.1486
0.8470	3.9029	19.1093
0.8480	3.9283	19.0695
0.8490	3.9537	19.0294
0.8500	3.9791	18.9890
0.8510	4.0045	18.9486
0.8520	4.0299	18.9081
0.8530	4.0553	18.8676
0.8540	4.0807	18.8268
0.8550	4.1061	18.7859
0.8560	4.1315	18.7446
0.8570	4.1569	18.7031
0.8580	4.1823	18.6616
0.8590	4.2077	18.6199
0.8600	4.2331	18.5784
0.8610	4.2585	18.5370
0.8620	4.2839	18.4957
0.8630	4.3093	18.4545
0.8640	4.3347	18.4134
0.8650	4.3601	18.3723
0.8660	4.3855	18.3312
0.8670	4.4109	18.2900
0.8680	4.4362	18.2490
0.8690	4.4616	18.2080
0.8700	4.4870	18.1671
0.8710	4.5124	18.1264
0.8720	4.5378	18.0856
0.8730	4.5632	18.0448
0.8740	4.5886	18.0034
0.8750	4.6140	17.9607
0.8760	4.6394	17.9162
0.8770	4.6647	17.8696
0.8780	4.6901	17.8208
0.8790	4.7153	17.7702
0.8800	4.7406	17.7182
0.8810	4.7657	17.6648
0.8820	4.7907	17.6101
0.8830	4.8157	17.5541
0.8840	4.8405	17.4969
0.8850	4.8652	17.4385
0.8860	4.8896	17.3790
0.8870	4.9139	17.3185
0.8880	4.9380	17.2570
0.8890	4.9618	17.1945
0.8900	4.9854	17.1309
0.8910	5.0087	17.0664
0.8920	5.0317	17.0008
