# Supplementary material for: Integrated Puncture Score: force–displacement weighted rind penetration tests improve stalk lodging resistance estimations in maize
Source: Plant Methods. 2020 Aug 15;16:113. doi: 10.1186/s13007-020-00654-w (PMC7429900; doi:10.1186/s13007-020-00654-w)
Supplement: Supplementary file 5 — Additional file 5. Example force-displacement data from a puncture test. [file 13007_2020_654_MOESM5_ESM.csv]

Time	Displacement	Force
(s)	(mm)	(N)
0.0000	-15.2723	0.0037
0.0010	-15.2723	0.0039
0.0020	-15.2723	0.0041
0.0030	-15.2723	0.0046
0.0040	-15.2723	0.0056
0.0050	-15.2723	0.0075
0.0060	-15.2723	0.0104
0.0070	-15.2722	0.0143
0.0080	-15.2722	0.0195
0.0090	-15.2721	0.0261
0.0100	-15.2719	0.0341
0.0110	-15.2717	0.0434
0.0120	-15.2714	0.0536
0.0130	-15.2711	0.0641
0.0140	-15.2706	0.0747
0.0150	-15.2700	0.0851
0.0160	-15.2692	0.0954
0.0170	-15.2683	0.1058
0.0180	-15.2673	0.1166
0.0190	-15.2660	0.1279
0.0200	-15.2645	0.1397
0.0210	-15.2627	0.1517
0.0220	-15.2608	0.1637
0.0230	-15.2585	0.1756
0.0240	-15.2560	0.1874
0.0250	-15.2531	0.1991
0.0260	-15.2500	0.2108
0.0270	-15.2464	0.2223
0.0280	-15.2426	0.2336
0.0290	-15.2383	0.2446
0.0300	-15.2337	0.2553
0.0310	-15.2286	0.2656
0.0320	-15.2231	0.2755
0.0330	-15.2172	0.2853
0.0340	-15.2109	0.2956
0.0350	-15.2040	0.3084
0.0360	-15.1967	0.3265
0.0370	-15.1889	0.3539
0.0380	-15.1806	0.3946
0.0390	-15.1717	0.4527
0.0400	-15.1624	0.5319
0.0410	-15.1525	0.6356
0.0420	-15.1420	0.7667
0.0430	-15.1310	0.9277
0.0440	-15.1194	1.1205
0.0450	-15.1072	1.3468
0.0460	-15.0945	1.6077
0.0470	-15.0811	1.9038
0.0480	-15.0672	2.2345
0.0490	-15.0527	2.5990
0.0500	-15.0375	2.9960
0.0510	-15.0218	3.4241
0.0520	-15.0054	3.8823
0.0530	-14.9885	4.3696
0.0540	-14.9710	4.8854
0.0550	-14.9530	5.4286
0.0560	-14.9344	5.9980
0.0570	-14.9153	6.5921
0.0580	-14.8957	7.2092
0.0590	-14.8757	7.8474
0.0600	-14.8552	8.5050
0.0610	-14.8343	9.1802
0.0620	-14.8131	9.8714
0.0630	-14.7914	10.5771
0.0640	-14.7695	11.2956
0.0650	-14.7472	12.0255
0.0660	-14.7246	12.7653
0.0670	-14.7018	13.5139
0.0680	-14.6787	14.2701
0.0690	-14.6554	15.0327
0.0700	-14.6319	15.8007
0.0710	-14.6082	16.5730
0.0720	-14.5843	17.3487
0.0730	-14.5603	18.1267
0.0740	-14.5361	18.9063
0.0750	-14.5118	19.6868
0.0760	-14.4874	20.4675
0.0770	-14.4629	21.2477
0.0780	-14.4383	22.0266
0.0790	-14.4135	22.8037
0.0800	-14.3887	23.5782
0.0810	-14.3638	24.3495
0.0820	-14.3389	25.1172
0.0830	-14.3138	25.8808
0.0840	-14.2887	26.6396
0.0850	-14.2636	27.3927
0.0860	-14.2384	28.1395
0.0870	-14.2131	28.8794
0.0880	-14.1878	29.6120
0.0890	-14.1624	30.3367
0.0900	-14.1370	31.0529
0.0910	-14.1116	31.7597
0.0920	-14.0861	32.4566
0.0930	-14.0605	33.1430
0.0940	-14.0350	33.8186
0.0950	-14.0094	34.4831
0.0960	-13.9837	35.1360
0.0970	-13.9581	35.7770
0.0980	-13.9324	36.4063
0.0990	-13.9066	37.0244
0.1000	-13.8809	37.6316
0.1010	-13.8551	38.2276
0.1020	-13.8293	38.8122
0.1030	-13.8035	39.3850
0.1040	-13.7776	39.9457
0.1050	-13.7518	40.4944
0.1060	-13.7259	41.0313
0.1070	-13.7000	41.5566
0.1080	-13.6741	42.0706
0.1090	-13.6482	42.5735
0.1100	-13.6223	43.0657
0.1110	-13.5963	43.5474
0.1120	-13.5704	44.0187
0.1130	-13.5445	44.4795
0.1140	-13.5185	44.9291
0.1150	-13.4926	45.3674
0.1160	-13.4666	45.7943
0.1170	-13.4407	46.2098
0.1180	-13.4148	46.6143
0.1190	-13.3888	47.0077
0.1200	-13.3629	47.3897
0.1210	-13.3370	47.7599
0.1220	-13.3111	48.1181
0.1230	-13.2852	48.4638
0.1240	-13.2593	48.7969
0.1250	-13.2334	49.1178
0.1260	-13.2076	49.4274
0.1270	-13.1817	49.7263
0.1280	-13.1559	50.0153
0.1290	-13.1300	50.2952
0.1300	-13.1042	50.5664
0.1310	-13.0784	50.8290
0.1320	-13.0526	51.0834
0.1330	-13.0269	51.3299
0.1340	-13.0011	51.5691
0.1350	-12.9754	51.8017
0.1360	-12.9496	52.0281
0.1370	-12.9239	52.2482
0.1380	-12.8982	52.4619
0.1390	-12.8725	52.6687
0.1400	-12.8469	52.8678
0.1410	-12.8212	53.0586
0.1420	-12.7955	53.2380
0.1430	-12.7699	53.3995
0.1440	-12.7443	53.5349
0.1450	-12.7187	53.6335
0.1460	-12.6931	53.6833
0.1470	-12.6675	53.6762
0.1480	-12.6419	53.6114
0.1490	-12.6163	53.4928
0.1500	-12.5907	53.3266
0.1510	-12.5652	53.1184
0.1520	-12.5396	52.8719
0.1530	-12.5141	52.5893
0.1540	-12.4886	52.2733
0.1550	-12.4630	51.9269
0.1560	-12.4375	51.5536
0.1570	-12.4120	51.1572
0.1580	-12.3865	50.7415
0.1590	-12.3610	50.3103
0.1600	-12.3355	49.8668
0.1610	-12.3100	49.4135
0.1620	-12.2845	48.9517
0.1630	-12.2590	48.4828
0.1640	-12.2336	48.0090
0.1650	-12.2081	47.5329
0.1660	-12.1826	47.0572
0.1670	-12.1572	46.5842
0.1680	-12.1317	46.1162
0.1690	-12.1062	45.6550
0.1700	-12.0808	45.2017
0.1710	-12.0553	44.7576
0.1720	-12.0299	44.3234
0.1730	-12.0044	43.9003
0.1740	-11.9790	43.4889
0.1750	-11.9535	43.0899
0.1760	-11.9281	42.7036
0.1770	-11.9027	42.3301
0.1780	-11.8772	41.9694
0.1790	-11.8518	41.6218
0.1800	-11.8263	41.2879
0.1810	-11.8009	40.9684
0.1820	-11.7755	40.6641
0.1830	-11.7500	40.3755
0.1840	-11.7246	40.1030
0.1850	-11.6992	39.8465
0.1860	-11.6738	39.6053
0.1870	-11.6483	39.3788
0.1880	-11.6229	39.1662
0.1890	-11.5975	38.9669
0.1900	-11.5720	38.7798
0.1910	-11.5466	38.6041
0.1920	-11.5212	38.4393
0.1930	-11.4958	38.2852
0.1940	-11.4704	38.1421
0.1950	-11.4449	38.0102
0.1960	-11.4195	37.8895
0.1970	-11.3941	37.7797
0.1980	-11.3687	37.6803
0.1990	-11.3432	37.5893
0.2000	-11.3178	37.4965
0.2010	-11.2924	37.3814
0.2020	-11.2670	37.2242
0.2030	-11.2416	37.0152
0.2040	-11.2161	36.7528
0.2050	-11.1907	36.4372
0.2060	-11.1653	36.0665
0.2070	-11.1399	35.6404
0.2080	-11.1145	35.1615
0.2090	-11.0890	34.6342
0.2100	-11.0636	34.0646
0.2110	-11.0382	33.4588
0.2120	-11.0128	32.8227
0.2130	-10.9874	32.1619
0.2140	-10.9619	31.4811
0.2150	-10.9365	30.7849
0.2160	-10.9111	30.0773
0.2170	-10.8857	29.3618
0.2180	-10.8602	28.6419
0.2190	-10.8348	27.9208
0.2200	-10.8094	27.2013
0.2210	-10.7840	26.4862
0.2220	-10.7586	25.7775
0.2230	-10.7331	25.0773
0.2240	-10.7077	24.3875
0.2250	-10.6823	23.7096
0.2260	-10.6569	23.0452
0.2270	-10.6315	22.3954
0.2280	-10.6061	21.7613
0.2290	-10.5806	21.1441
0.2300	-10.5552	20.5448
0.2310	-10.5298	19.9642
0.2320	-10.5044	19.4033
0.2330	-10.4790	18.8630
0.2340	-10.4536	18.3439
0.2350	-10.4282	17.8465
0.2360	-10.4027	17.3708
0.2370	-10.3773	16.9167
0.2380	-10.3519	16.4842
0.2390	-10.3265	16.0731
0.2400	-10.3011	15.6833
0.2410	-10.2757	15.3146
0.2420	-10.2502	14.9667
0.2430	-10.2248	14.6394
0.2440	-10.1994	14.3324
0.2450	-10.1740	14.0453
0.2460	-10.1486	13.7777
0.2470	-10.1232	13.5290
0.2480	-10.0978	13.2984
0.2490	-10.0723	13.0854
0.2500	-10.0469	12.8889
0.2510	-10.0215	12.7080
0.2520	-9.9961	12.5420
0.2530	-9.9707	12.3900
0.2540	-9.9453	12.2504
0.2550	-9.9199	12.1218
0.2560	-9.8945	12.0032
0.2570	-9.8691	11.8937
0.2580	-9.8437	11.7929
0.2590	-9.8183	11.7000
0.2600	-9.7929	11.6146
0.2610	-9.7675	11.5363
0.2620	-9.7420	11.4650
0.2630	-9.7166	11.4002
0.2640	-9.6912	11.3417
0.2650	-9.6658	11.2891
0.2660	-9.6404	11.2421
0.2670	-9.6150	11.2003
0.2680	-9.5896	11.1632
0.2690	-9.5642	11.1304
0.2700	-9.5388	11.1012
0.2710	-9.5134	11.0746
0.2720	-9.4880	11.0490
0.2730	-9.4626	11.0231
0.2740	-9.4372	10.9962
0.2750	-9.4118	10.9679
0.2760	-9.3864	10.9382
0.2770	-9.3610	10.9074
0.2780	-9.3356	10.8756
0.2790	-9.3102	10.8427
0.2800	-9.2848	10.8087
0.2810	-9.2594	10.7734
0.2820	-9.2340	10.7366
0.2830	-9.2086	10.6982
0.2840	-9.1832	10.6583
0.2850	-9.1578	10.6168
0.2860	-9.1324	10.5735
0.2870	-9.1070	10.5283
0.2880	-9.0816	10.4810
0.2890	-9.0562	10.4319
0.2900	-9.0308	10.3808
0.2910	-9.0054	10.3278
0.2920	-8.9800	10.2729
0.2930	-8.9546	10.2161
0.2940	-8.9292	10.1574
0.2950	-8.9038	10.0969
0.2960	-8.8784	10.0346
0.2970	-8.8530	9.9706
0.2980	-8.8276	9.9050
0.2990	-8.8022	9.8380
0.3000	-8.7768	9.7699
0.3010	-8.7513	9.7008
0.3020	-8.7259	9.6310
0.3030	-8.7005	9.5609
0.3040	-8.6751	9.4905
0.3050	-8.6497	9.4198
0.3060	-8.6243	9.3488
0.3070	-8.5989	9.2779
0.3080	-8.5735	9.2073
0.3090	-8.5481	9.1371
0.3100	-8.5226	9.0676
0.3110	-8.4972	8.9991
0.3120	-8.4718	8.9318
0.3130	-8.4464	8.8661
0.3140	-8.4210	8.8019
0.3150	-8.3956	8.7390
0.3160	-8.3702	8.6774
0.3170	-8.3448	8.6171
0.3180	-8.3194	8.5585
0.3190	-8.2940	8.5015
0.3200	-8.2685	8.4460
0.3210	-8.2431	8.3920
0.3220	-8.2177	8.3395
0.3230	-8.1923	8.2885
0.3240	-8.1669	8.2391
0.3250	-8.1415	8.1911
0.3260	-8.1161	8.1444
0.3270	-8.0907	8.0985
0.3280	-8.0653	8.0533
0.3290	-8.0399	8.0086
0.3300	-8.0145	7.9646
0.3310	-7.9890	7.9212
0.3320	-7.9636	7.8786
0.3330	-7.9382	7.8367
0.3340	-7.9128	7.7957
0.3350	-7.8874	7.7558
0.3360	-7.8620	7.7169
0.3370	-7.8366	7.6792
0.3380	-7.8112	7.6427
0.3390	-7.7858	7.6074
0.3400	-7.7604	7.5733
0.3410	-7.7350	7.5405
0.3420	-7.7096	7.5090
0.3430	-7.6842	7.4787
0.3440	-7.6588	7.4499
0.3450	-7.6334	7.4225
0.3460	-7.6080	7.3966
0.3470	-7.5826	7.3716
0.3480	-7.5572	7.3474
0.3490	-7.5318	7.3233
0.3500	-7.5063	7.2992
0.3510	-7.4809	7.2751
0.3520	-7.4555	7.2512
0.3530	-7.4301	7.2277
0.3540	-7.4047	7.2048
0.3550	-7.3793	7.1828
0.3560	-7.3539	7.1615
0.3570	-7.3285	7.1409
0.3580	-7.3031	7.1210
0.3590	-7.2777	7.1020
0.3600	-7.2523	7.0839
0.3610	-7.2269	7.0670
0.3620	-7.2015	7.0515
0.3630	-7.1761	7.0376
0.3640	-7.1507	7.0254
0.3650	-7.1253	7.0149
0.3660	-7.0999	7.0061
0.3670	-7.0745	6.9989
0.3680	-7.0491	6.9931
0.3690	-7.0237	6.9888
0.3700	-6.9983	6.9858
0.3710	-6.9729	6.9842
0.3720	-6.9475	6.9839
0.3730	-6.9221	6.9847
0.3740	-6.8967	6.9865
0.3750	-6.8713	6.9891
0.3760	-6.8459	6.9922
0.3770	-6.8205	6.9954
0.3780	-6.7952	6.9986
0.3790	-6.7698	7.0017
0.3800	-6.7444	7.0046
0.3810	-6.7190	7.0073
0.3820	-6.6936	7.0098
0.3830	-6.6682	7.0125
0.3840	-6.6428	7.0154
0.3850	-6.6174	7.0184
0.3860	-6.5920	7.0214
0.3870	-6.5666	7.0242
0.3880	-6.5412	7.0269
0.3890	-6.5158	7.0296
0.3900	-6.4904	7.0327
0.3910	-6.4650	7.0360
0.3920	-6.4396	7.0392
0.3930	-6.4142	7.0421
0.3940	-6.3888	7.0449
0.3950	-6.3634	7.0479
0.3960	-6.3380	7.0510
0.3970	-6.3126	7.0540
0.3980	-6.2872	7.0570
0.3990	-6.2618	7.0599
0.4000	-6.2364	7.0629
0.4010	-6.2110	7.0663
0.4020	-6.1856	7.0702
0.4030	-6.1602	7.0751
0.4040	-6.1348	7.0809
0.4050	-6.1094	7.0878
0.4060	-6.0840	7.0958
0.4070	-6.0586	7.1050
0.4080	-6.0332	7.1154
0.4090	-6.0078	7.1270
0.4100	-5.9824	7.1398
0.4110	-5.9570	7.1539
0.4120	-5.9316	7.1695
0.4130	-5.9062	7.1867
0.4140	-5.8808	7.2052
0.4150	-5.8554	7.2247
0.4160	-5.8300	7.2448
0.4170	-5.8045	7.2652
0.4180	-5.7791	7.2859
0.4190	-5.7537	7.3068
0.4200	-5.7283	7.3278
0.4210	-5.7029	7.3489
0.4220	-5.6775	7.3696
0.4230	-5.6521	7.3892
0.4240	-5.6267	7.4072
0.4250	-5.6013	7.4234
0.4260	-5.5759	7.4381
0.4270	-5.5505	7.4516
0.4280	-5.5251	7.4641
0.4290	-5.4997	7.4760
0.4300	-5.4743	7.4876
0.4310	-5.4489	7.4990
0.4320	-5.4235	7.5103
0.4330	-5.3981	7.5215
0.4340	-5.3727	7.5325
0.4350	-5.3473	7.5435
0.4360	-5.3219	7.5546
0.4370	-5.2965	7.5657
0.4380	-5.2711	7.5770
0.4390	-5.2457	7.5883
0.4400	-5.2203	7.5998
0.4410	-5.1950	7.6113
0.4420	-5.1696	7.6229
0.4430	-5.1442	7.6346
0.4440	-5.1188	7.6465
0.4450	-5.0934	7.6584
0.4460	-5.0680	7.6702
0.4470	-5.0426	7.6816
0.4480	-5.0172	7.6923
0.4490	-4.9918	7.7020
0.4500	-4.9664	7.7104
0.4510	-4.9410	7.7177
0.4520	-4.9156	7.7240
0.4530	-4.8902	7.7292
0.4540	-4.8648	7.7334
0.4550	-4.8394	7.7364
0.4560	-4.8140	7.7383
0.4570	-4.7886	7.7389
0.4580	-4.7632	7.7381
0.4590	-4.7378	7.7359
0.4600	-4.7124	7.7326
0.4610	-4.6870	7.7280
0.4620	-4.6616	7.7223
0.4630	-4.6362	7.7156
0.4640	-4.6108	7.7078
0.4650	-4.5854	7.6993
0.4660	-4.5600	7.6899
0.4670	-4.5346	7.6801
0.4680	-4.5092	7.6700
0.4690	-4.4838	7.6598
0.4700	-4.4584	7.6495
0.4710	-4.4330	7.6396
0.4720	-4.4076	7.6303
0.4730	-4.3822	7.6218
0.4740	-4.3568	7.6143
0.4750	-4.3314	7.6075
0.4760	-4.3060	7.6015
0.4770	-4.2806	7.5962
0.4780	-4.2552	7.5915
0.4790	-4.2298	7.5877
0.4800	-4.2044	7.5851
0.4810	-4.1790	7.5837
0.4820	-4.1536	7.5837
0.4830	-4.1282	7.5850
0.4840	-4.1028	7.5874
0.4850	-4.0774	7.5909
0.4860	-4.0520	7.5953
0.4870	-4.0266	7.6005
0.4880	-4.0012	7.6066
0.4890	-3.9758	7.6134
0.4900	-3.9504	7.6211
0.4910	-3.9250	7.6295
0.4920	-3.8996	7.6386
0.4930	-3.8742	7.6483
0.4940	-3.8489	7.6589
0.4950	-3.8235	7.6705
0.4960	-3.7981	7.6830
0.4970	-3.7727	7.6964
0.4980	-3.7473	7.7106
0.4990	-3.7219	7.7256
0.5000	-3.6965	7.7415
0.5010	-3.6711	7.7587
0.5020	-3.6457	7.7775
0.5030	-3.6203	7.7979
0.5040	-3.5949	7.8200
0.5050	-3.5695	7.8435
0.5060	-3.5441	7.8685
0.5070	-3.5187	7.8947
0.5080	-3.4933	7.9221
0.5090	-3.4679	7.9508
0.5100	-3.4425	7.9807
0.5110	-3.4171	8.0118
0.5120	-3.3917	8.0440
0.5130	-3.3663	8.0774
0.5140	-3.3409	8.1120
0.5150	-3.3155	8.1479
0.5160	-3.2901	8.1850
0.5170	-3.2647	8.2231
0.5180	-3.2393	8.2620
0.5190	-3.2139	8.3017
0.5200	-3.1885	8.3418
0.5210	-3.1631	8.3824
0.5220	-3.1377	8.4232
0.5230	-3.1123	8.4639
0.5240	-3.0869	8.5040
0.5250	-3.0615	8.5435
0.5260	-3.0361	8.5824
0.5270	-3.0107	8.6207
0.5280	-2.9853	8.6586
0.5290	-2.9599	8.6956
0.5300	-2.9345	8.7318
0.5310	-2.9091	8.7669
0.5320	-2.8837	8.8011
0.5330	-2.8583	8.8344
0.5340	-2.8329	8.8671
0.5350	-2.8075	8.8994
0.5360	-2.7821	8.9309
0.5370	-2.7567	8.9615
0.5380	-2.7313	8.9912
0.5390	-2.7059	9.0200
0.5400	-2.6805	9.0479
0.5410	-2.6551	9.0753
0.5420	-2.6297	9.1023
0.5430	-2.6043	9.1293
0.5440	-2.5789	9.1563
0.5450	-2.5535	9.1835
0.5460	-2.5281	9.2111
0.5470	-2.5027	9.2389
0.5480	-2.4773	9.2671
0.5490	-2.4519	9.2958
0.5500	-2.4265	9.3250
0.5510	-2.4011	9.3549
0.5520	-2.3757	9.3855
0.5530	-2.3503	9.4162
0.5540	-2.3249	9.4467
0.5550	-2.2995	9.4767
0.5560	-2.2741	9.5059
0.5570	-2.2487	9.5347
0.5580	-2.2233	9.5630
0.5590	-2.1979	9.5914
0.5600	-2.1725	9.6199
0.5610	-2.1470	9.6488
0.5620	-2.1216	9.6786
0.5630	-2.0962	9.7094
0.5640	-2.0708	9.7412
0.5650	-2.0454	9.7742
0.5660	-2.0200	9.8083
0.5670	-1.9946	9.8437
0.5680	-1.9692	9.8805
0.5690	-1.9438	9.9188
0.5700	-1.9184	9.9584
0.5710	-1.8930	9.9994
0.5720	-1.8676	10.0416
0.5730	-1.8422	10.0851
0.5740	-1.8168	10.1299
0.5750	-1.7914	10.1761
0.5760	-1.7660	10.2239
0.5770	-1.7406	10.2733
0.5780	-1.7152	10.3246
0.5790	-1.6898	10.3783
0.5800	-1.6644	10.4347
0.5810	-1.6390	10.4944
0.5820	-1.6136	10.5578
0.5830	-1.5882	10.6255
0.5840	-1.5628	10.6980
0.5850	-1.5374	10.7760
0.5860	-1.5120	10.8601
0.5870	-1.4866	10.9511
0.5880	-1.4612	11.0499
0.5890	-1.4358	11.1571
0.5900	-1.4104	11.2736
0.5910	-1.3850	11.3999
0.5920	-1.3596	11.5367
0.5930	-1.3342	11.6846
0.5940	-1.3088	11.8443
0.5950	-1.2834	12.0162
0.5960	-1.2580	12.2003
0.5970	-1.2326	12.3967
0.5980	-1.2072	12.6060
0.5990	-1.1818	12.8293
0.6000	-1.1564	13.0682
0.6010	-1.1310	13.3242
0.6020	-1.1056	13.5989
0.6030	-1.0802	13.8933
0.6040	-1.0548	14.2082
0.6050	-1.0294	14.5440
0.6060	-1.0040	14.9013
0.6070	-0.9786	15.2804
0.6080	-0.9532	15.6813
0.6090	-0.9278	16.1039
0.6100	-0.9024	16.5485
0.6110	-0.8770	17.0152
0.6120	-0.8516	17.5041
0.6130	-0.8262	18.0154
0.6140	-0.8008	18.5491
0.6150	-0.7754	19.1049
0.6160	-0.7500	19.6823
0.6170	-0.7246	20.2809
0.6180	-0.6992	20.9004
0.6190	-0.6738	21.5404
0.6200	-0.6484	22.2006
0.6210	-0.6230	22.8804
0.6220	-0.5976	23.5792
0.6230	-0.5722	24.2963
0.6240	-0.5468	25.0310
0.6250	-0.5214	25.7828
0.6260	-0.4960	26.5509
0.6270	-0.4706	27.3348
0.6280	-0.4452	28.1343
0.6290	-0.4198	28.9497
0.6300	-0.3944	29.7812
0.6310	-0.3690	30.6293
0.6320	-0.3436	31.4938
0.6330	-0.3182	32.3741
0.6340	-0.2928	33.2688
0.6350	-0.2674	34.1755
0.6360	-0.2420	35.0912
0.6370	-0.2166	36.0133
0.6380	-0.1912	36.9408
0.6390	-0.1658	37.8736
0.6400	-0.1404	38.8129
0.6410	-0.1150	39.7595
0.6420	-0.0896	40.7137
0.6430	-0.0642	41.6760
0.6440	-0.0389	42.6463
0.6450	-0.0135	43.6233
0.6460	0.0119	44.6027
0.6470	0.0373	45.5777
0.6480	0.0627	46.5418
0.6490	0.0881	47.4908
0.6500	0.1135	48.4217
0.6510	0.1389	49.3255
0.6520	0.1643	50.1840
0.6530	0.1897	50.9791
0.6540	0.2151	51.6994
0.6550	0.2405	52.3395
0.6560	0.2659	52.8974
0.6570	0.2913	53.3731
0.6580	0.3167	53.7662
0.6590	0.3421	54.0733
0.6600	0.3675	54.2867
0.6610	0.3929	54.3977
0.6620	0.4183	54.3995
0.6630	0.4436	54.2881
0.6640	0.4690	54.0634
0.6650	0.4944	53.7300
0.6660	0.5198	53.2958
0.6670	0.5452	52.7702
0.6680	0.5706	52.1632
0.6690	0.5960	51.4840
0.6700	0.6214	50.7411
0.6710	0.6468	49.9426
0.6720	0.6722	49.0960
0.6730	0.6976	48.2081
0.6740	0.7230	47.2853
0.6750	0.7484	46.3336
0.6760	0.7738	45.3588
0.6770	0.7992	44.3659
0.6780	0.8246	43.3603
0.6790	0.8500	42.3465
0.6800	0.8754	41.3289
0.6810	0.9008	40.3112
0.6820	0.9262	39.2966
0.6830	0.9516	38.2882
0.6840	0.9770	37.2890
0.6850	1.0024	36.3021
0.6860	1.0278	35.3301
0.6870	1.0532	34.3748
0.6880	1.0787	33.4381
0.6890	1.1041	32.5213
0.6900	1.1295	31.6258
0.6910	1.1549	30.7531
0.6920	1.1803	29.9039
0.6930	1.2057	29.0791
0.6940	1.2311	28.2789
0.6950	1.2565	27.5039
0.6960	1.2819	26.7546
0.6970	1.3073	26.0317
0.6980	1.3328	25.3357
0.6990	1.3582	24.6666
0.7000	1.3836	24.0244
0.7010	1.4090	23.4090
0.7020	1.4344	22.8204
0.7030	1.4598	22.2581
0.7040	1.4852	21.7220
0.7050	1.5106	21.2115
0.7060	1.5360	20.7263
0.7070	1.5614	20.2657
0.7080	1.5868	19.8294
0.7090	1.6122	19.4168
0.7100	1.6376	19.0272
0.7110	1.6631	18.6597
0.7120	1.6885	18.3138
0.7130	1.7139	17.9889
0.7140	1.7393	17.6842
0.7150	1.7647	17.3991
0.7160	1.7901	17.1326
0.7170	1.8155	16.8840
0.7180	1.8409	16.6524
0.7190	1.8663	16.4372
0.7200	1.8917	16.2376
0.7210	1.9171	16.0528
0.7220	1.9425	15.8822
0.7230	1.9679	15.7251
0.7240	1.9933	15.5808
0.7250	2.0187	15.4485
0.7260	2.0441	15.3275
0.7270	2.0695	15.2171
0.7280	2.0949	15.1166
0.7290	2.1203	15.0254
0.7300	2.1457	14.9429
0.7310	2.1711	14.8687
0.7320	2.1965	14.8023
0.7330	2.2219	14.7432
0.7340	2.2473	14.6908
0.7350	2.2727	14.6447
0.7360	2.2981	14.6045
0.7370	2.3235	14.5697
0.7380	2.3489	14.5398
0.7390	2.3743	14.5146
0.7400	2.3997	14.4938
0.7410	2.4251	14.4769
0.7420	2.4505	14.4635
0.7430	2.4759	14.4532
0.7440	2.5013	14.4456
0.7450	2.5267	14.4406
0.7460	2.5521	14.4378
0.7470	2.5775	14.4369
0.7480	2.6029	14.4377
0.7490	2.6283	14.4400
0.7500	2.6537	14.4436
0.7510	2.6791	14.4484
0.7520	2.7045	14.4541
0.7530	2.7299	14.4605
0.7540	2.7553	14.4674
0.7550	2.7807	14.4746
0.7560	2.8061	14.4820
0.7570	2.8315	14.4895
0.7580	2.8569	14.4972
0.7590	2.8823	14.5048
0.7600	2.9077	14.5123
0.7610	2.9331	14.5193
0.7620	2.9585	14.5257
0.7630	2.9839	14.5311
0.7640	3.0093	14.5355
0.7650	3.0347	14.5387
0.7660	3.0601	14.5406
0.7670	3.0855	14.5414
0.7680	3.1109	14.5410
0.7690	3.1363	14.5396
0.7700	3.1617	14.5372
0.7710	3.1871	14.5336
0.7720	3.2125	14.5288
0.7730	3.2379	14.5227
0.7740	3.2633	14.5152
0.7750	3.2887	14.5062
0.7760	3.3141	14.4959
0.7770	3.3395	14.4840
0.7780	3.3649	14.4704
0.7790	3.3903	14.4553
0.7800	3.4157	14.4386
0.7810	3.4411	14.4205
0.7820	3.4665	14.4010
0.7830	3.4919	14.3800
0.7840	3.5173	14.3575
0.7850	3.5427	14.3334
0.7860	3.5681	14.3080
0.7870	3.5935	14.2814
0.7880	3.6189	14.2535
0.7890	3.6443	14.2243
0.7900	3.6697	14.1939
0.7910	3.6951	14.1622
0.7920	3.7205	14.1293
0.7930	3.7459	14.0953
0.7940	3.7713	14.0600
0.7950	3.7967	14.0237
0.7960	3.8221	13.9863
0.7970	3.8475	13.9478
0.7980	3.8729	13.9085
0.7990	3.8983	13.8683
0.8000	3.9237	13.8273
0.8010	3.9491	13.7856
0.8020	3.9745	13.7436
0.8030	3.9999	13.7017
0.8040	4.0253	13.6599
0.8050	4.0507	13.6182
0.8060	4.0761	13.5766
0.8070	4.1015	13.5350
0.8080	4.1269	13.4934
0.8090	4.1523	13.4520
0.8100	4.1777	13.4109
0.8110	4.2031	13.3702
0.8120	4.2285	13.3300
0.8130	4.2539	13.2903
0.8140	4.2792	13.2512
0.8150	4.3046	13.2126
0.8160	4.3300	13.1747
0.8170	4.3554	13.1376
0.8180	4.3808	13.1015
0.8190	4.4062	13.0664
0.8200	4.4316	13.0321
0.8210	4.4570	12.9986
0.8220	4.4824	12.9656
0.8230	4.5078	12.9334
0.8240	4.5332	12.9018
0.8250	4.5586	12.8709
0.8260	4.5840	12.8402
0.8270	4.6094	12.8091
0.8280	4.6347	12.7768
0.8290	4.6601	12.7421
0.8300	4.6854	12.7042
0.8310	4.7107	12.6625
0.8320	4.7358	12.6172
0.8330	4.7609	12.5688
0.8340	4.7858	12.5184
0.8350	4.8106	12.4666
0.8360	4.8352	12.4137
0.8370	4.8595	12.3599
0.8380	4.8836	12.3052
0.8390	4.9073	12.2496
0.8400	4.9308	12.1932
0.8410	4.9539	12.1363
0.8420	4.9765	12.0791
0.8430	4.9988	12.0214
0.8440	5.0206	11.9631
0.8450	5.0420	11.9040
