# Supplementary material for: Integrated Puncture Score: force–displacement weighted rind penetration tests improve stalk lodging resistance estimations in maize
Source: Plant Methods. 2020 Aug 15;16:113. doi: 10.1186/s13007-020-00654-w (PMC7429900; doi:10.1186/s13007-020-00654-w)
Supplement: Supplementary file 6 — Additional file 6. Example force-displacement data from a puncture test. [file 13007_2020_654_MOESM6_ESM.csv]

Time	Displacement	Force
(s)	(mm)	(N)
0.0000	-16.0588	0.0032
0.0010	-16.0588	0.0038
0.0020	-16.0588	0.0042
0.0030	-16.0588	0.0047
0.0040	-16.0588	0.0053
0.0050	-16.0588	0.0063
0.0060	-16.0588	0.0082
0.0070	-16.0587	0.0116
0.0080	-16.0587	0.0172
0.0090	-16.0586	0.0249
0.0100	-16.0585	0.0341
0.0110	-16.0582	0.0439
0.0120	-16.0580	0.0537
0.0130	-16.0576	0.0636
0.0140	-16.0571	0.0738
0.0150	-16.0565	0.0845
0.0160	-16.0558	0.0955
0.0170	-16.0549	0.1067
0.0180	-16.0538	0.1179
0.0190	-16.0526	0.1290
0.0200	-16.0511	0.1400
0.0210	-16.0494	0.1514
0.0220	-16.0475	0.1631
0.0230	-16.0452	0.1752
0.0240	-16.0427	0.1872
0.0250	-16.0399	0.1988
0.0260	-16.0368	0.2097
0.0270	-16.0333	0.2203
0.0280	-16.0294	0.2308
0.0290	-16.0252	0.2413
0.0300	-16.0206	0.2519
0.0310	-16.0156	0.2622
0.0320	-16.0101	0.2721
0.0330	-16.0042	0.2815
0.0340	-15.9979	0.2904
0.0350	-15.9910	0.2991
0.0360	-15.9837	0.3076
0.0370	-15.9759	0.3158
0.0380	-15.9676	0.3238
0.0390	-15.9588	0.3312
0.0400	-15.9494	0.3382
0.0410	-15.9395	0.3449
0.0420	-15.9291	0.3519
0.0430	-15.9180	0.3609
0.0440	-15.9065	0.3754
0.0450	-15.8943	0.4003
0.0460	-15.8815	0.4414
0.0470	-15.8682	0.5044
0.0480	-15.8542	0.5939
0.0490	-15.8396	0.7135
0.0500	-15.8245	0.8656
0.0510	-15.8087	1.0522
0.0520	-15.7924	1.2749
0.0530	-15.7755	1.5350
0.0540	-15.7580	1.8328
0.0550	-15.7400	2.1681
0.0560	-15.7215	2.5394
0.0570	-15.7025	2.9452
0.0580	-15.6831	3.3832
0.0590	-15.6632	3.8513
0.0600	-15.6429	4.3479
0.0610	-15.6221	4.8710
0.0620	-15.6011	5.4192
0.0630	-15.5796	5.9906
0.0640	-15.5579	6.5834
0.0650	-15.5358	7.1959
0.0660	-15.5135	7.8263
0.0670	-15.4909	8.4729
0.0680	-15.4681	9.1342
0.0690	-15.4450	9.8087
0.0700	-15.4217	10.4949
0.0710	-15.3983	11.1918
0.0720	-15.3747	11.8975
0.0730	-15.3509	12.6096
0.0740	-15.3270	13.3255
0.0750	-15.3029	14.0427
0.0760	-15.2787	14.7597
0.0770	-15.2543	15.4755
0.0780	-15.2299	16.1896
0.0790	-15.2054	16.9010
0.0800	-15.1807	17.6087
0.0810	-15.1560	18.3112
0.0820	-15.1312	19.0079
0.0830	-15.1063	19.6979
0.0840	-15.0813	20.3809
0.0850	-15.0562	21.0566
0.0860	-15.0311	21.7249
0.0870	-15.0059	22.3857
0.0880	-14.9806	23.0390
0.0890	-14.9553	23.6846
0.0900	-14.9299	24.3224
0.0910	-14.9044	24.9522
0.0920	-14.8789	25.5739
0.0930	-14.8534	26.1877
0.0940	-14.8278	26.7938
0.0950	-14.8022	27.3923
0.0960	-14.7765	27.9836
0.0970	-14.7507	28.5678
0.0980	-14.7250	29.1451
0.0990	-14.6992	29.7155
0.1000	-14.6733	30.2791
0.1010	-14.6475	30.8360
0.1020	-14.6216	31.3866
0.1030	-14.5957	31.9310
0.1040	-14.5697	32.4699
0.1050	-14.5438	33.0036
0.1060	-14.5178	33.5321
0.1070	-14.4918	34.0557
0.1080	-14.4658	34.5742
0.1090	-14.4398	35.0878
0.1100	-14.4138	35.5963
0.1110	-14.3877	36.0999
0.1120	-14.3617	36.5985
0.1130	-14.3356	37.0920
0.1140	-14.3096	37.5800
0.1150	-14.2836	38.0620
0.1160	-14.2575	38.5366
0.1170	-14.2315	39.0029
0.1180	-14.2055	39.4601
0.1190	-14.1794	39.9080
0.1200	-14.1534	40.3464
0.1210	-14.1274	40.7754
0.1220	-14.1014	41.1950
0.1230	-14.0754	41.6054
0.1240	-14.0494	42.0072
0.1250	-14.0235	42.4009
0.1260	-13.9975	42.7871
0.1270	-13.9716	43.1659
0.1280	-13.9457	43.5374
0.1290	-13.9198	43.9014
0.1300	-13.8939	44.2575
0.1310	-13.8680	44.6058
0.1320	-13.8421	44.9466
0.1330	-13.8163	45.2801
0.1340	-13.7905	45.6064
0.1350	-13.7646	45.9249
0.1360	-13.7388	46.2345
0.1370	-13.7131	46.5346
0.1380	-13.6873	46.8250
0.1390	-13.6615	47.1058
0.1400	-13.6358	47.3768
0.1410	-13.6101	47.6352
0.1420	-13.5844	47.8752
0.1430	-13.5587	48.0914
0.1440	-13.5330	48.2808
0.1450	-13.5073	48.4432
0.1460	-13.4817	48.5797
0.1470	-13.4560	48.6907
0.1480	-13.4304	48.7757
0.1490	-13.4048	48.8304
0.1500	-13.3791	48.8462
0.1510	-13.3535	48.8155
0.1520	-13.3280	48.7354
0.1530	-13.3024	48.6064
0.1540	-13.2768	48.4326
0.1550	-13.2512	48.2188
0.1560	-13.2257	47.9704
0.1570	-13.2001	47.6923
0.1580	-13.1746	47.3883
0.1590	-13.1490	47.0623
0.1600	-13.1235	46.7176
0.1610	-13.0980	46.3577
0.1620	-13.0725	45.9859
0.1630	-13.0470	45.6052
0.1640	-13.0215	45.2180
0.1650	-12.9960	44.8260
0.1660	-12.9705	44.4302
0.1670	-12.9450	44.0313
0.1680	-12.9195	43.6303
0.1690	-12.8940	43.2281
0.1700	-12.8686	42.8262
0.1710	-12.8431	42.4263
0.1720	-12.8176	42.0303
0.1730	-12.7921	41.6396
0.1740	-12.7667	41.2556
0.1750	-12.7412	40.8798
0.1760	-12.7158	40.5135
0.1770	-12.6903	40.1583
0.1780	-12.6648	39.8152
0.1790	-12.6394	39.4853
0.1800	-12.6139	39.1694
0.1810	-12.5885	38.8680
0.1820	-12.5630	38.5810
0.1830	-12.5376	38.3081
0.1840	-12.5121	38.0490
0.1850	-12.4867	37.8036
0.1860	-12.4612	37.5723
0.1870	-12.4358	37.3550
0.1880	-12.4103	37.1521
0.1890	-12.3849	36.9634
0.1900	-12.3594	36.7887
0.1910	-12.3340	36.6276
0.1920	-12.3085	36.4800
0.1930	-12.2831	36.3457
0.1940	-12.2576	36.2211
0.1950	-12.2322	36.0918
0.1960	-12.2068	35.9349
0.1970	-12.1813	35.7331
0.1980	-12.1559	35.4788
0.1990	-12.1304	35.1731
0.2000	-12.1050	34.8216
0.2010	-12.0796	34.4312
0.2020	-12.0541	34.0091
0.2030	-12.0287	33.5615
0.2040	-12.0033	33.0932
0.2050	-11.9778	32.6086
0.2060	-11.9524	32.1113
0.2070	-11.9270	31.6048
0.2080	-11.9015	31.0925
0.2090	-11.8761	30.5773
0.2100	-11.8507	30.0621
0.2110	-11.8253	29.5496
0.2120	-11.7998	29.0418
0.2130	-11.7744	28.5400
0.2140	-11.7490	28.0438
0.2150	-11.7235	27.5491
0.2160	-11.6981	27.0493
0.2170	-11.6727	26.5386
0.2180	-11.6473	26.0125
0.2190	-11.6218	25.4696
0.2200	-11.5964	24.9109
0.2210	-11.5710	24.3394
0.2220	-11.5456	23.7589
0.2230	-11.5201	23.1730
0.2240	-11.4947	22.5853
0.2250	-11.4693	21.9987
0.2260	-11.4439	21.4154
0.2270	-11.4185	20.8375
0.2280	-11.3930	20.2666
0.2290	-11.3676	19.7045
0.2300	-11.3422	19.1527
0.2310	-11.3168	18.6128
0.2320	-11.2914	18.0860
0.2330	-11.2659	17.5735
0.2340	-11.2405	17.0759
0.2350	-11.2151	16.5938
0.2360	-11.1897	16.1275
0.2370	-11.1642	15.6768
0.2380	-11.1388	15.2419
0.2390	-11.1134	14.8228
0.2400	-11.0880	14.4196
0.2410	-11.0626	14.0322
0.2420	-11.0371	13.6603
0.2430	-11.0117	13.3036
0.2440	-10.9863	12.9618
0.2450	-10.9609	12.6351
0.2460	-10.9355	12.3233
0.2470	-10.9100	12.0264
0.2480	-10.8846	11.7440
0.2490	-10.8592	11.4760
0.2500	-10.8338	11.2221
0.2510	-10.8084	10.9821
0.2520	-10.7829	10.7557
0.2530	-10.7575	10.5424
0.2540	-10.7321	10.3414
0.2550	-10.7067	10.1524
0.2560	-10.6813	9.9750
0.2570	-10.6559	9.8092
0.2580	-10.6305	9.6544
0.2590	-10.6051	9.5101
0.2600	-10.5796	9.3760
0.2610	-10.5542	9.2517
0.2620	-10.5288	9.1367
0.2630	-10.5034	9.0306
0.2640	-10.4780	8.9328
0.2650	-10.4526	8.8427
0.2660	-10.4272	8.7601
0.2670	-10.4018	8.6844
0.2680	-10.3764	8.6154
0.2690	-10.3510	8.5526
0.2700	-10.3255	8.4958
0.2710	-10.3001	8.4449
0.2720	-10.2747	8.3995
0.2730	-10.2493	8.3594
0.2740	-10.2239	8.3242
0.2750	-10.1985	8.2935
0.2760	-10.1731	8.2668
0.2770	-10.1477	8.2436
0.2780	-10.1223	8.2236
0.2790	-10.0969	8.2064
0.2800	-10.0715	8.1919
0.2810	-10.0461	8.1798
0.2820	-10.0207	8.1702
0.2830	-9.9953	8.1629
0.2840	-9.9699	8.1578
0.2850	-9.9445	8.1545
0.2860	-9.9191	8.1531
0.2870	-9.8937	8.1532
0.2880	-9.8683	8.1546
0.2890	-9.8429	8.1572
0.2900	-9.8175	8.1608
0.2910	-9.7921	8.1653
0.2920	-9.7667	8.1706
0.2930	-9.7413	8.1765
0.2940	-9.7159	8.1833
0.2950	-9.6905	8.1910
0.2960	-9.6651	8.1994
0.2970	-9.6397	8.2083
0.2980	-9.6143	8.2173
0.2990	-9.5889	8.2257
0.3000	-9.5635	8.2331
0.3010	-9.5381	8.2390
0.3020	-9.5127	8.2427
0.3030	-9.4872	8.2437
0.3040	-9.4618	8.2412
0.3050	-9.4364	8.2349
0.3060	-9.4110	8.2246
0.3070	-9.3856	8.2100
0.3080	-9.3602	8.1909
0.3090	-9.3348	8.1671
0.3100	-9.3094	8.1386
0.3110	-9.2840	8.1053
0.3120	-9.2586	8.0673
0.3130	-9.2332	8.0250
0.3140	-9.2078	7.9787
0.3150	-9.1824	7.9291
0.3160	-9.1570	7.8768
0.3170	-9.1316	7.8222
0.3180	-9.1062	7.7655
0.3190	-9.0808	7.7070
0.3200	-9.0554	7.6469
0.3210	-9.0300	7.5853
0.3220	-9.0046	7.5228
0.3230	-8.9792	7.4595
0.3240	-8.9538	7.3957
0.3250	-8.9284	7.3313
0.3260	-8.9030	7.2664
0.3270	-8.8776	7.2010
0.3280	-8.8522	7.1355
0.3290	-8.8268	7.0701
0.3300	-8.8014	7.0053
0.3310	-8.7759	6.9413
0.3320	-8.7505	6.8784
0.3330	-8.7251	6.8173
0.3340	-8.6997	6.7580
0.3350	-8.6743	6.7009
0.3360	-8.6489	6.6462
0.3370	-8.6235	6.5939
0.3380	-8.5981	6.5443
0.3390	-8.5727	6.4973
0.3400	-8.5473	6.4531
0.3410	-8.5219	6.4117
0.3420	-8.4965	6.3731
0.3430	-8.4710	6.3372
0.3440	-8.4456	6.3039
0.3450	-8.4202	6.2732
0.3460	-8.3948	6.2446
0.3470	-8.3694	6.2180
0.3480	-8.3440	6.1932
0.3490	-8.3186	6.1702
0.3500	-8.2932	6.1491
0.3510	-8.2678	6.1300
0.3520	-8.2424	6.1128
0.3530	-8.2170	6.0974
0.3540	-8.1916	6.0836
0.3550	-8.1662	6.0713
0.3560	-8.1408	6.0605
0.3570	-8.1154	6.0512
0.3580	-8.0900	6.0433
0.3590	-8.0646	6.0367
0.3600	-8.0392	6.0313
0.3610	-8.0137	6.0273
0.3620	-7.9883	6.0246
0.3630	-7.9629	6.0231
0.3640	-7.9375	6.0230
0.3650	-7.9121	6.0240
0.3660	-7.8867	6.0264
0.3670	-7.8613	6.0300
0.3680	-7.8359	6.0347
0.3690	-7.8105	6.0405
0.3700	-7.7851	6.0472
0.3710	-7.7597	6.0547
0.3720	-7.7343	6.0634
0.3730	-7.7089	6.0730
0.3740	-7.6835	6.0837
0.3750	-7.6581	6.0952
0.3760	-7.6327	6.1072
0.3770	-7.6073	6.1197
0.3780	-7.5819	6.1328
0.3790	-7.5565	6.1464
0.3800	-7.5311	6.1604
0.3810	-7.5057	6.1747
0.3820	-7.4803	6.1890
0.3830	-7.4549	6.2032
0.3840	-7.4295	6.2173
0.3850	-7.4041	6.2312
0.3860	-7.3787	6.2450
0.3870	-7.3533	6.2585
0.3880	-7.3279	6.2718
0.3890	-7.3025	6.2849
0.3900	-7.2771	6.2977
0.3910	-7.2517	6.3098
0.3920	-7.2263	6.3207
0.3930	-7.2008	6.3303
0.3940	-7.1754	6.3386
0.3950	-7.1500	6.3458
0.3960	-7.1246	6.3522
0.3970	-7.0992	6.3578
0.3980	-7.0739	6.3624
0.3990	-7.0485	6.3661
0.4000	-7.0231	6.3690
0.4010	-6.9977	6.3713
0.4020	-6.9723	6.3735
0.4030	-6.9469	6.3757
0.4040	-6.9215	6.3779
0.4050	-6.8961	6.3799
0.4060	-6.8707	6.3815
0.4070	-6.8453	6.3824
0.4080	-6.8199	6.3829
0.4090	-6.7945	6.3830
0.4100	-6.7691	6.3830
0.4110	-6.7437	6.3830
0.4120	-6.7183	6.3832
0.4130	-6.6930	6.3839
0.4140	-6.6676	6.3853
0.4150	-6.6422	6.3875
0.4160	-6.6168	6.3908
0.4170	-6.5914	6.3949
0.4180	-6.5660	6.3998
0.4190	-6.5406	6.4058
0.4200	-6.5152	6.4130
0.4210	-6.4898	6.4215
0.4220	-6.4644	6.4312
0.4230	-6.4390	6.4419
0.4240	-6.4136	6.4536
0.4250	-6.3882	6.4662
0.4260	-6.3628	6.4798
0.4270	-6.3374	6.4944
0.4280	-6.3120	6.5096
0.4290	-6.2866	6.5253
0.4300	-6.2612	6.5414
0.4310	-6.2358	6.5579
0.4320	-6.2104	6.5746
0.4330	-6.1849	6.5914
0.4340	-6.1595	6.6082
0.4350	-6.1341	6.6246
0.4360	-6.1087	6.6403
0.4370	-6.0833	6.6548
0.4380	-6.0579	6.6681
0.4390	-6.0325	6.6795
0.4400	-6.0071	6.6886
0.4410	-5.9817	6.6953
0.4420	-5.9563	6.6997
0.4430	-5.9309	6.7023
0.4440	-5.9055	6.7034
0.4450	-5.8801	6.7032
0.4460	-5.8547	6.7016
0.4470	-5.8293	6.6984
0.4480	-5.8039	6.6939
0.4490	-5.7785	6.6883
0.4500	-5.7531	6.6817
0.4510	-5.7277	6.6747
0.4520	-5.7023	6.6673
0.4530	-5.6769	6.6597
0.4540	-5.6515	6.6521
0.4550	-5.6261	6.6446
0.4560	-5.6007	6.6374
0.4570	-5.5753	6.6308
0.4580	-5.5499	6.6251
0.4590	-5.5245	6.6205
0.4600	-5.4991	6.6172
0.4610	-5.4737	6.6156
0.4620	-5.4483	6.6157
0.4630	-5.4229	6.6175
0.4640	-5.3975	6.6207
0.4650	-5.3721	6.6252
0.4660	-5.3467	6.6311
0.4670	-5.3213	6.6386
0.4680	-5.2959	6.6477
0.4690	-5.2705	6.6583
0.4700	-5.2451	6.6700
0.4710	-5.2197	6.6824
0.4720	-5.1943	6.6955
0.4730	-5.1689	6.7093
0.4740	-5.1435	6.7238
0.4750	-5.1181	6.7394
0.4760	-5.0927	6.7563
0.4770	-5.0673	6.7745
0.4780	-5.0419	6.7942
0.4790	-5.0165	6.8153
0.4800	-4.9911	6.8380
0.4810	-4.9657	6.8621
0.4820	-4.9403	6.8873
0.4830	-4.9149	6.9136
0.4840	-4.8895	6.9403
0.4850	-4.8641	6.9669
0.4860	-4.8387	6.9931
0.4870	-4.8133	7.0189
0.4880	-4.7879	7.0443
0.4890	-4.7625	7.0695
0.4900	-4.7371	7.0943
0.4910	-4.7117	7.1190
0.4920	-4.6863	7.1434
0.4930	-4.6609	7.1673
0.4940	-4.6355	7.1902
0.4950	-4.6101	7.2116
0.4960	-4.5847	7.2311
0.4970	-4.5593	7.2487
0.4980	-4.5339	7.2645
0.4990	-4.5085	7.2785
0.5000	-4.4831	7.2901
0.5010	-4.4577	7.2991
0.5020	-4.4323	7.3057
0.5030	-4.4069	7.3102
0.5040	-4.3815	7.3132
0.5050	-4.3561	7.3152
0.5060	-4.3307	7.3163
0.5070	-4.3053	7.3168
0.5080	-4.2799	7.3166
0.5090	-4.2545	7.3158
0.5100	-4.2291	7.3143
0.5110	-4.2037	7.3119
0.5120	-4.1783	7.3090
0.5130	-4.1529	7.3055
0.5140	-4.1275	7.3015
0.5150	-4.1021	7.2972
0.5160	-4.0767	7.2926
0.5170	-4.0513	7.2880
0.5180	-4.0260	7.2835
0.5190	-4.0006	7.2791
0.5200	-3.9752	7.2749
0.5210	-3.9498	7.2712
0.5220	-3.9244	7.2683
0.5230	-3.8990	7.2666
0.5240	-3.8736	7.2664
0.5250	-3.8482	7.2683
0.5260	-3.8228	7.2725
0.5270	-3.7974	7.2794
0.5280	-3.7720	7.2890
0.5290	-3.7466	7.3014
0.5300	-3.7212	7.3165
0.5310	-3.6958	7.3340
0.5320	-3.6704	7.3538
0.5330	-3.6450	7.3756
0.5340	-3.6196	7.3991
0.5350	-3.5942	7.4241
0.5360	-3.5688	7.4503
0.5370	-3.5434	7.4775
0.5380	-3.5180	7.5057
0.5390	-3.4926	7.5348
0.5400	-3.4672	7.5646
0.5410	-3.4418	7.5951
0.5420	-3.4164	7.6255
0.5430	-3.3910	7.6557
0.5440	-3.3656	7.6854
0.5450	-3.3402	7.7146
0.5460	-3.3148	7.7432
0.5470	-3.2894	7.7710
0.5480	-3.2640	7.7980
0.5490	-3.2386	7.8238
0.5500	-3.2132	7.8485
0.5510	-3.1878	7.8716
0.5520	-3.1624	7.8930
0.5530	-3.1370	7.9125
0.5540	-3.1116	7.9302
0.5550	-3.0862	7.9466
0.5560	-3.0608	7.9617
0.5570	-3.0354	7.9758
0.5580	-3.0100	7.9894
0.5590	-2.9846	8.0027
0.5600	-2.9592	8.0159
0.5610	-2.9338	8.0290
0.5620	-2.9084	8.0417
0.5630	-2.8830	8.0538
0.5640	-2.8576	8.0652
0.5650	-2.8322	8.0760
0.5660	-2.8068	8.0862
0.5670	-2.7814	8.0956
0.5680	-2.7560	8.1042
0.5690	-2.7306	8.1118
0.5700	-2.7052	8.1186
0.5710	-2.6798	8.1247
0.5720	-2.6544	8.1305
0.5730	-2.6290	8.1360
0.5740	-2.6036	8.1415
0.5750	-2.5782	8.1473
0.5760	-2.5528	8.1536
0.5770	-2.5274	8.1607
0.5780	-2.5019	8.1686
0.5790	-2.4765	8.1774
0.5800	-2.4511	8.1870
0.5810	-2.4257	8.1977
0.5820	-2.4003	8.2096
0.5830	-2.3749	8.2231
0.5840	-2.3495	8.2381
0.5850	-2.3241	8.2548
0.5860	-2.2987	8.2732
0.5870	-2.2733	8.2937
0.5880	-2.2479	8.3168
0.5890	-2.2225	8.3429
0.5900	-2.1971	8.3727
0.5910	-2.1717	8.4065
0.5920	-2.1463	8.4448
0.5930	-2.1209	8.4880
0.5940	-2.0955	8.5362
0.5950	-2.0701	8.5897
0.5960	-2.0447	8.6488
0.5970	-2.0193	8.7138
0.5980	-1.9939	8.7851
0.5990	-1.9685	8.8634
0.6000	-1.9430	8.9495
0.6010	-1.9176	9.0441
0.6020	-1.8922	9.1483
0.6030	-1.8668	9.2631
0.6040	-1.8414	9.3897
0.6050	-1.8160	9.5290
0.6060	-1.7906	9.6821
0.6070	-1.7653	9.8504
0.6080	-1.7399	10.0350
0.6090	-1.7145	10.2371
0.6100	-1.6891	10.4585
0.6110	-1.6637	10.7004
0.6120	-1.6383	10.9643
0.6130	-1.6129	11.2515
0.6140	-1.5875	11.5630
0.6150	-1.5621	11.9001
0.6160	-1.5367	12.2638
0.6170	-1.5113	12.6545
0.6180	-1.4859	13.0711
0.6190	-1.4606	13.5113
0.6200	-1.4352	13.9735
0.6210	-1.4098	14.4569
0.6220	-1.3844	14.9618
0.6230	-1.3590	15.4885
0.6240	-1.3336	16.0374
0.6250	-1.3082	16.6089
0.6260	-1.2828	17.2032
0.6270	-1.2574	17.8207
0.6280	-1.2320	18.4613
0.6290	-1.2066	19.1248
0.6300	-1.1812	19.8110
0.6310	-1.1558	20.5190
0.6320	-1.1304	21.2479
0.6330	-1.1050	21.9971
0.6340	-1.0796	22.7656
0.6350	-1.0542	23.5530
0.6360	-1.0288	24.3592
0.6370	-1.0034	25.1850
0.6380	-0.9780	26.0312
0.6390	-0.9526	26.8987
0.6400	-0.9272	27.7880
0.6410	-0.9018	28.6995
0.6420	-0.8764	29.6330
0.6430	-0.8510	30.5886
0.6440	-0.8256	31.5659
0.6450	-0.8002	32.5645
0.6460	-0.7748	33.5842
0.6470	-0.7494	34.6246
0.6480	-0.7240	35.6850
0.6490	-0.6986	36.7645
0.6500	-0.6732	37.8604
0.6510	-0.6478	38.9685
0.6520	-0.6224	40.0846
0.6530	-0.5970	41.2046
0.6540	-0.5716	42.3261
0.6550	-0.5462	43.4482
0.6560	-0.5208	44.5706
0.6570	-0.4954	45.6937
0.6580	-0.4700	46.8181
0.6590	-0.4446	47.9442
0.6600	-0.4192	49.0728
0.6610	-0.3938	50.2048
0.6620	-0.3684	51.3409
0.6630	-0.3430	52.4821
0.6640	-0.3176	53.6298
0.6650	-0.2922	54.7846
0.6660	-0.2668	55.9464
0.6670	-0.2414	57.1136
0.6680	-0.2160	58.2840
0.6690	-0.1906	59.4537
0.6700	-0.1652	60.6171
0.6710	-0.1399	61.7673
0.6720	-0.1145	62.8920
0.6730	-0.0891	63.9728
0.6740	-0.0637	64.9962
0.6750	-0.0383	65.9574
0.6760	-0.0129	66.8559
0.6770	0.0125	67.6888
0.6780	0.0379	68.4457
0.6790	0.0633	69.1092
0.6800	0.0887	69.6581
0.6810	0.1141	70.0725
0.6820	0.1395	70.3402
0.6830	0.1648	70.4594
0.6840	0.1902	70.4360
0.6850	0.2156	70.2800
0.6860	0.2410	70.0025
0.6870	0.2664	69.6138
0.6880	0.2918	69.1228
0.6890	0.3172	68.5374
0.6900	0.3426	67.8630
0.6910	0.3680	67.1029
0.6920	0.3934	66.2602
0.6930	0.4188	65.3389
0.6940	0.4442	64.3431
0.6950	0.4696	63.2747
0.6960	0.4950	62.1349
0.6970	0.5204	60.9267
0.6980	0.5458	59.6559
0.6990	0.5712	58.3308
0.7000	0.5966	56.9601
0.7010	0.6220	55.5527
0.7020	0.6474	54.1167
0.7030	0.6728	52.6597
0.7040	0.6982	51.1884
0.7050	0.7237	49.7088
0.7060	0.7491	48.2267
0.7070	0.7745	46.7473
0.7080	0.7999	45.2754
0.7090	0.8253	43.8154
0.7100	0.8507	42.3715
0.7110	0.8761	40.9476
0.7120	0.9015	39.5468
0.7130	0.9269	38.1722
0.7140	0.9524	36.8262
0.7150	0.9778	35.5111
0.7160	1.0032	34.2290
0.7170	1.0286	32.9814
0.7180	1.0540	31.7696
0.7190	1.0794	30.5943
0.7200	1.1048	29.4563
0.7210	1.1303	28.3565
0.7220	1.1557	27.2957
0.7230	1.1811	26.2743
0.7240	1.2065	25.2927
0.7250	1.2319	24.3508
0.7260	1.2573	23.4482
0.7270	1.2827	22.5848
0.7280	1.3081	21.7604
0.7290	1.3335	20.9744
0.7300	1.3589	20.2262
0.7310	1.3844	19.5150
0.7320	1.4098	18.8401
0.7330	1.4352	18.2007
0.7340	1.4606	17.5959
0.7350	1.4860	17.0249
0.7360	1.5114	16.4865
0.7370	1.5368	15.9798
0.7380	1.5622	15.5035
0.7390	1.5876	15.0566
0.7400	1.6130	14.6382
0.7410	1.6384	14.2469
0.7420	1.6638	13.8817
0.7430	1.6892	13.5415
0.7440	1.7146	13.2251
0.7450	1.7400	12.9319
0.7460	1.7654	12.6608
0.7470	1.7908	12.4107
0.7480	1.8162	12.1807
0.7490	1.8416	11.9696
0.7500	1.8670	11.7763
0.7510	1.8924	11.5998
0.7520	1.9178	11.4391
0.7530	1.9432	11.2933
0.7540	1.9686	11.1616
0.7550	1.9940	11.0431
0.7560	2.0194	10.9370
0.7570	2.0448	10.8424
0.7580	2.0702	10.7586
0.7590	2.0956	10.6847
0.7600	2.1210	10.6200
0.7610	2.1464	10.5638
0.7620	2.1718	10.5154
0.7630	2.1972	10.4743
0.7640	2.2226	10.4397
0.7650	2.2480	10.4112
0.7660	2.2734	10.3883
0.7670	2.2988	10.3706
0.7680	2.3242	10.3575
0.7690	2.3496	10.3487
0.7700	2.3750	10.3436
0.7710	2.4004	10.3421
0.7720	2.4258	10.3434
0.7730	2.4513	10.3473
0.7740	2.4767	10.3532
0.7750	2.5021	10.3606
0.7760	2.5275	10.3694
0.7770	2.5529	10.3791
0.7780	2.5783	10.3895
0.7790	2.6037	10.4006
0.7800	2.6291	10.4121
0.7810	2.6545	10.4239
0.7820	2.6799	10.4358
0.7830	2.7053	10.4474
0.7840	2.7306	10.4584
0.7850	2.7560	10.4686
0.7860	2.7814	10.4777
0.7870	2.8068	10.4856
0.7880	2.8322	10.4925
0.7890	2.8576	10.4984
0.7900	2.8830	10.5034
0.7910	2.9084	10.5075
0.7920	2.9338	10.5105
0.7930	2.9592	10.5123
0.7940	2.9846	10.5127
0.7950	3.0100	10.5117
0.7960	3.0354	10.5093
0.7970	3.0608	10.5057
0.7980	3.0862	10.5009
0.7990	3.1116	10.4950
0.8000	3.1370	10.4881
0.8010	3.1624	10.4802
0.8020	3.1878	10.4713
0.8030	3.2132	10.4615
0.8040	3.2386	10.4507
0.8050	3.2641	10.4391
0.8060	3.2895	10.4267
0.8070	3.3149	10.4136
0.8080	3.3403	10.3997
0.8090	3.3657	10.3849
0.8100	3.3910	10.3692
0.8110	3.4164	10.3525
0.8120	3.4418	10.3347
0.8130	3.4672	10.3158
0.8140	3.4926	10.2959
0.8150	3.5180	10.2749
0.8160	3.5434	10.2530
0.8170	3.5688	10.2305
0.8180	3.5942	10.2077
0.8190	3.6196	10.1845
0.8200	3.6450	10.1612
0.8210	3.6704	10.1377
0.8220	3.6958	10.1140
0.8230	3.7212	10.0899
0.8240	3.7466	10.0657
0.8250	3.7720	10.0413
0.8260	3.7974	10.0168
0.8270	3.8228	9.9925
0.8280	3.8482	9.9683
0.8290	3.8736	9.9446
0.8300	3.8990	9.9212
0.8310	3.9244	9.8981
0.8320	3.9498	9.8754
0.8330	3.9751	9.8531
0.8340	4.0005	9.8317
0.8350	4.0259	9.8111
0.8360	4.0513	9.7912
0.8370	4.0767	9.7719
0.8380	4.1021	9.7532
0.8390	4.1275	9.7348
0.8400	4.1529	9.7171
0.8410	4.1783	9.7000
0.8420	4.2037	9.6835
0.8430	4.2291	9.6679
0.8440	4.2545	9.6532
0.8450	4.2799	9.6392
0.8460	4.3053	9.6263
0.8470	4.3307	9.6143
0.8480	4.3561	9.6032
0.8490	4.3815	9.5930
0.8500	4.4069	9.5836
0.8510	4.4323	9.5750
0.8520	4.4577	9.5671
0.8530	4.4830	9.5601
0.8540	4.5084	9.5540
0.8550	4.5338	9.5488
0.8560	4.5592	9.5445
0.8570	4.5846	9.5408
0.8580	4.6100	9.5371
0.8590	4.6354	9.5323
0.8600	4.6607	9.5255
0.8610	4.6861	9.5156
0.8620	4.7113	9.5020
0.8630	4.7365	9.4847
0.8640	4.7616	9.4644
0.8650	4.7865	9.4419
0.8660	4.8113	9.4177
0.8670	4.8358	9.3921
0.8680	4.8602	9.3653
0.8690	4.8842	9.3371
0.8700	4.9080	9.3076
0.8710	4.9315	9.2769
0.8720	4.9545	9.2453
0.8730	4.9772	9.2126
0.8740	4.9995	9.1788
0.8750	5.0213	9.1436
0.8760	5.0426	9.1068
